# Supplementary material for: Discovering high-resolution patterns of differential DNA methylation that correlate with gene expression changes
Source: PubMed Central journal article supplement — Nucleic Acids Res. 2013 Jun 7;41(14):6816–27. doi: 10.1093/nar/gkt482 (PMC3737560; doi:10.1093/nar/gkt482), 2013-06-07
Supplement: supp_gkt482_nar-00858-z-2013-File010.pdf [file supp_gkt482_nar-00858-z-2013-File010.pdf]

## **Supplemental Tables**

|                                                              |   |
|--------------------------------------------------------------|---|
| Table S1: Dataset characteristics                            | 2 |
| Table S2: Errant cluster rates for scrambled expression data | 3 |
| Table S3: DMR and promoter approach optimization parameters  | 4 |
| Table S4: MCF7 and T47D sequencing statistics                | 5 |

**Table S1** Dataset characteristics. Average coverage values are at CpG sites only. Average promoter coverage is calculated for CpG sites found within  $\pm 500$  bp of a gene's TSS as identified by RefSeq gene annotations. Number of bp indicates the number of DNA basepairs (bps) sequenced in the experiment.

| Dataset      | Sample  | Methylation Assay | Avg. Coverage | Avg. Promoter Coverage | Number of Reads                                   | Number of bp |
|--------------|---------|-------------------|---------------|------------------------|---------------------------------------------------|--------------|
| HMEC-HCC1954 | HMEC    | WGBS              | 22.6          | 19.6                   | $6.6 \times 10^8$                                 | 59.7 Gb      |
|              | HCC1954 | WGBS              | 30.7          | 27.5                   | $8.9 \times 10^8$                                 | 80.2 Gb      |
| IMR90-H1     | IMR90   | WGBS              | 28.5          | 14.1                   | $11.8 \times 10^8$                                | 91.0 Gb      |
|              | H1      | WGBS              | 25.6          | 11.2                   | $11.6 \times 10^8$                                | 87.5 Gb      |
| MCF7-T47D    | MCF7    | Methyl-MAPS       | 31.3          | 25.4                   | $34.4 \times 10^6$ McrBC<br>$37.9 \times 10^6$ RE | na           |
|              | T47D    | Methyl-MAPS       | 21.8          | 22.5                   | $30.3 \times 10^6$ McrBC<br>$23.9 \times 10^6$ RE | na           |

**Table S2** To examine the rate of false positives due to errant clusters, we randomly permuted the expression values of all genes. We clustered the methylation signatures as before, using default parameters for a 10kb window centered at the TSS. Any clusters that are identified as significant using a scrambled set of expression values are errant clusters. Results for 1000 permutations for each data set are shown. The errant cluster rate is the fraction of simulations with an errant cluster.

|              | Errant Cluster Rate | Avg Genes per Errant Cluster |
|--------------|---------------------|------------------------------|
| HMEC-HCC1954 | 1.70%               | 16.3                         |
| H1-IMR90     | 2.30%               | 16.0                         |
| MCF7-T47D    | 2.10%               | 14.7                         |

**Table S3** Complete set of parameters considered for optimization of DMR-based (upper) and promoter-based (lower) methods. The DMR procedure is described in the Methods.

| <b>DMR Approach Parameter Space</b>               |                                           |
|---------------------------------------------------|-------------------------------------------|
| FDR Cutoff                                        | 0.01, 0.05, 0.1                           |
| Differential CpG Methylation Threshold            | 0.3, 0.5, 0.7                             |
| First Window Size                                 | 100, 200, 300, 400, 500, 1000, 2000, 3000 |
| Min. Number of Differential CpGs in First Window  | 2, 3, 4, 5, 7, 10                         |
| Second Window Size                                | 200, 300, 400, 500, 1000, 2000, 4000      |
| Min. Number of Differential CpGs in Second Window | 3, 4, 5, 7, 10, 15, 20                    |

| <b>Promoter Approach Parameter Space</b> |                                    |
|------------------------------------------|------------------------------------|
| Window Size Upstream of TSS              | 0, 100, 250, 500, 1000, 2000, 5000 |
| Window Size Downstream of TSS            | 0, 100, 250, 500, 1000, 2000, 5000 |
| FDR Cutoff                               | off, 0.01, 0.05, 0.1               |
| Min Number of CpGs                       | 5, 10, 20, 30, 100                 |
| Min Average Methylation Change           | 0.2, 0.3, 0.4, 0.5, 0.6, 0.7, 0.8  |

**Table S4** Sequencing and mapping statistics for RNA-Seq and Methyl-MAPS experiments. Reads sequenced for Methyl-MAPS libraries are for the total number of R3 reads produced by SOLiD sequencing.

|                    | <b>Sample</b> | <b>Library</b>   | <b>Reads Sequenced</b> | <b>Read Pairs Uniquely Mapped</b> |
|--------------------|---------------|------------------|------------------------|-----------------------------------|
| <i>Methyl-MAPS</i> | T47D          | McrBC            | 64,666,229             | 30,290,561                        |
|                    |               | RE               | 63,250,316             | 23,945,047                        |
|                    | MCF7          | McrBC            | 66,068,188             | 34,427,094                        |
|                    |               | RE               | 80,235,306             | 37,871,733                        |
|                    | <b>Sample</b> | <b>Replicate</b> | <b>Reads Sequenced</b> | <b>Reads Uniquely Mapped</b>      |
| <i>RNA-Seq</i>     | T47D          | 1                | 6,648,462              | 4,698,558                         |
|                    |               | 2                | 8,178,748              | 5,808,317                         |
|                    | MCF7          | 1                | 17,407,241             | 15,233,215                        |
|                    |               | 2                | 26,088,462             | 22,472,874                        |
