# Supplementary material for: Discovering high-resolution patterns of differential DNA methylation that correlate with gene expression changes
Source: PubMed Central journal article supplement — Nucleic Acids Res. 2013 Jun 7;41(14):6816–27. doi: 10.1093/nar/gkt482 (PMC3737560; doi:10.1093/nar/gkt482), 2013-06-07
Supplement: supp_gkt482_nar-00858-z-2013-File012.pdf [file supp_gkt482_nar-00858-z-2013-File012.pdf]

## Supplementary Data File 1

### Complete clustering results for HMEC-HCC1954 WGBS data

The following pages contain all significant clusters identified in this dataset. The upper left panel on each page shows the full dendrogram. Methylation signatures are shown for each gene in the cluster marked in blue on the dendrogram. Expression values are plotted on a heat scale below the dendrogram (red is upregulated, green is downregulated). The upper right panel on each page is the section of the dendrogram with the identified cluster. The lower panel shows the individual methylation signatures for each gene in the cluster. For each signature, the y-axis represents the methylation difference score, ranging from -1 to 1. The x-axis denotes distance from the TSS, which is indicated by the vertical blue line at the center of each box. Blue tick marks indicate all CpG locations. Black dots represent all experimentally measured methylation difference scores. The black curve is the final signature used for clustering. Values in green and red denote the  $\log_2$  fold expression change: red for upregulated and green for downregulated.

### Example Pattern Clusters

See Figure 3 in main text for pattern descriptions

|        |                        |
|--------|------------------------|
| TSS1   | Clusters 5,7           |
| TSS2   | Clusters 2,3,6,10,11   |
| TSS2i  | Cluster 14             |
| PROX1i | Clusters 16, 25        |
| PROX2  | Clusters 9, 13, 15, 17 |
| PROX3i | Cluster s 1, 4, 8, 12  |

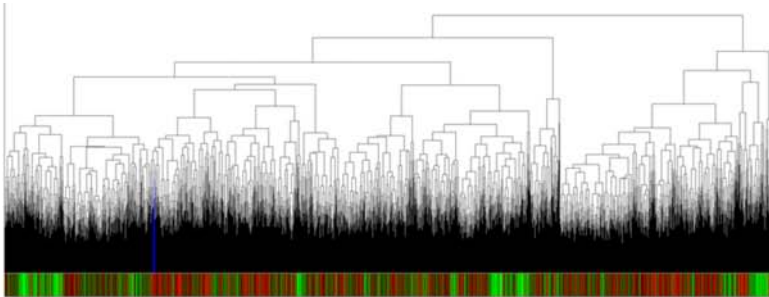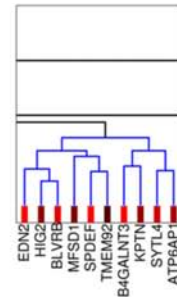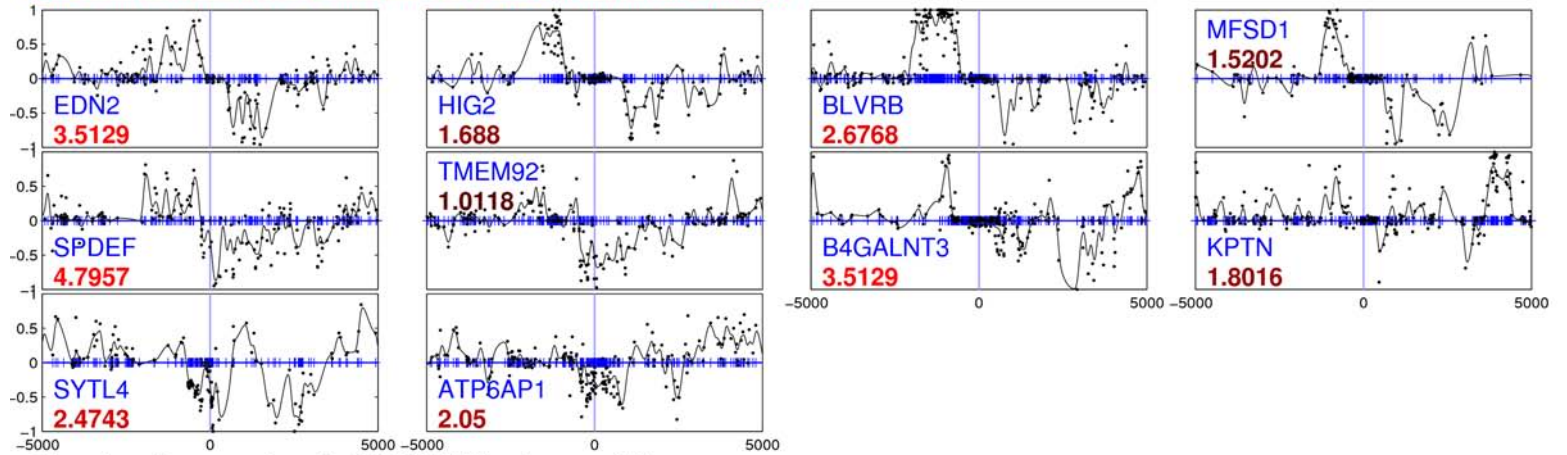

Cluster 1, pval = 0.0093613, size = 10

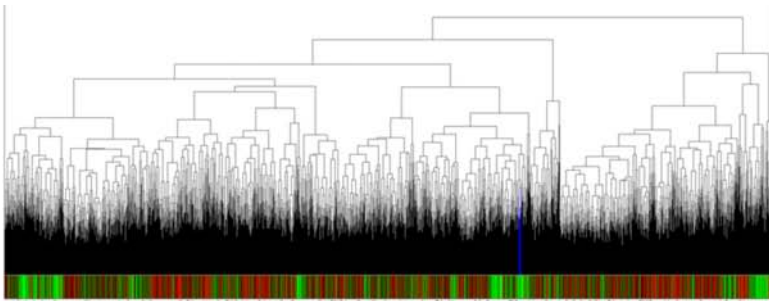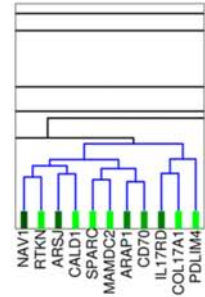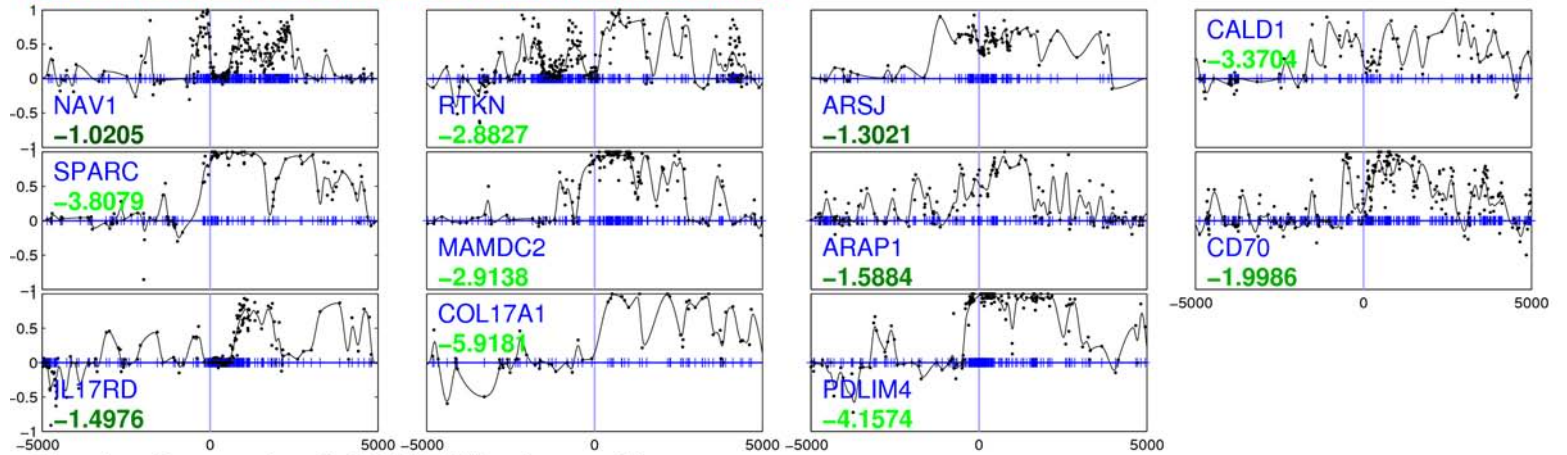

Cluster 2, pval = 0.0014724, size = 11

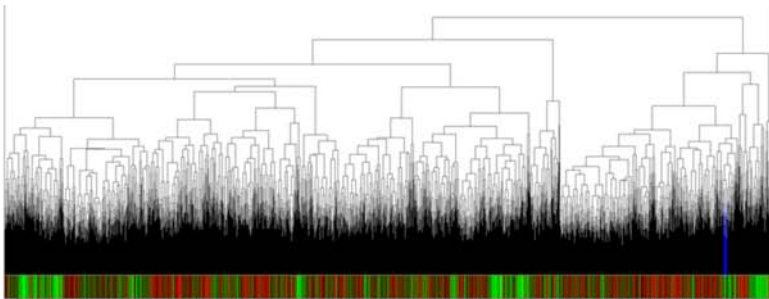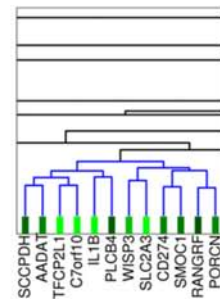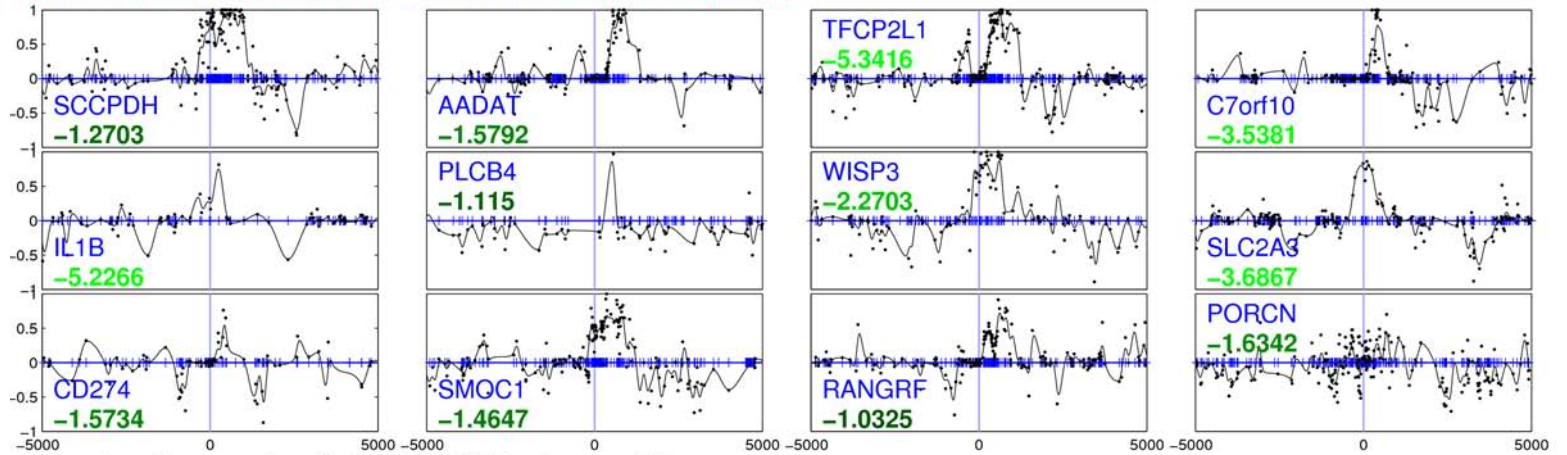

Cluster 3, pval = 0.00063357, size = 12

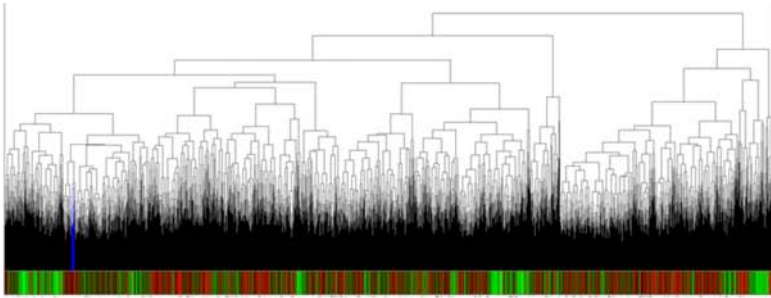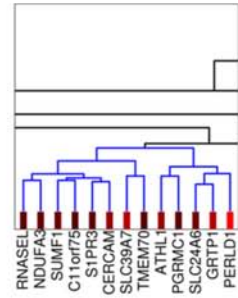

RNASEL  
 NDUFA3  
 SUMF1  
 C11orf75  
 S1PR3  
 CERCAM  
 SLC39A7  
 TMEM70  
 ATHL1  
 PGRMC1  
 SLC24A6  
 GRTP1  
 PERLD1

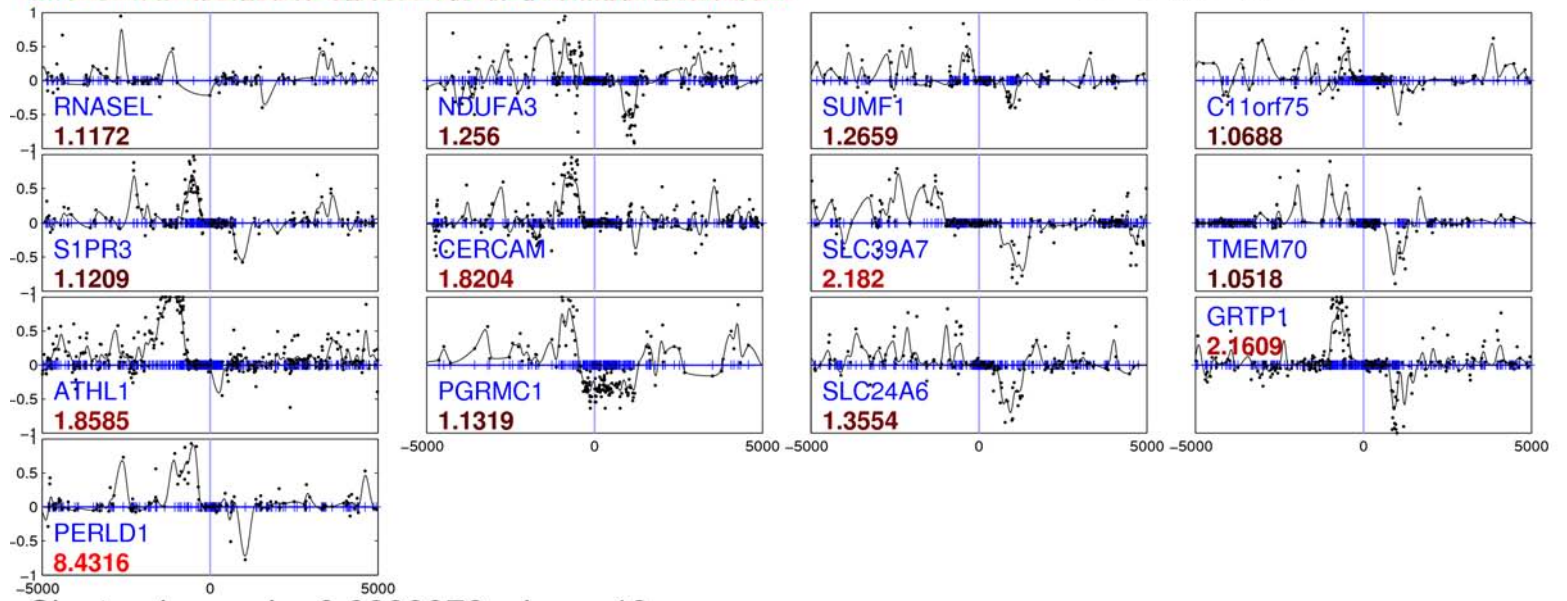

Cluster 4, pval = 0.0099378, size = 13



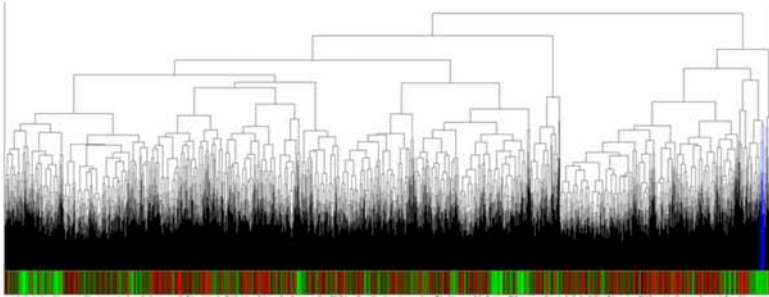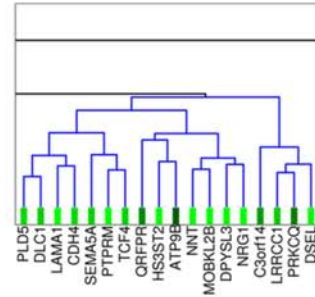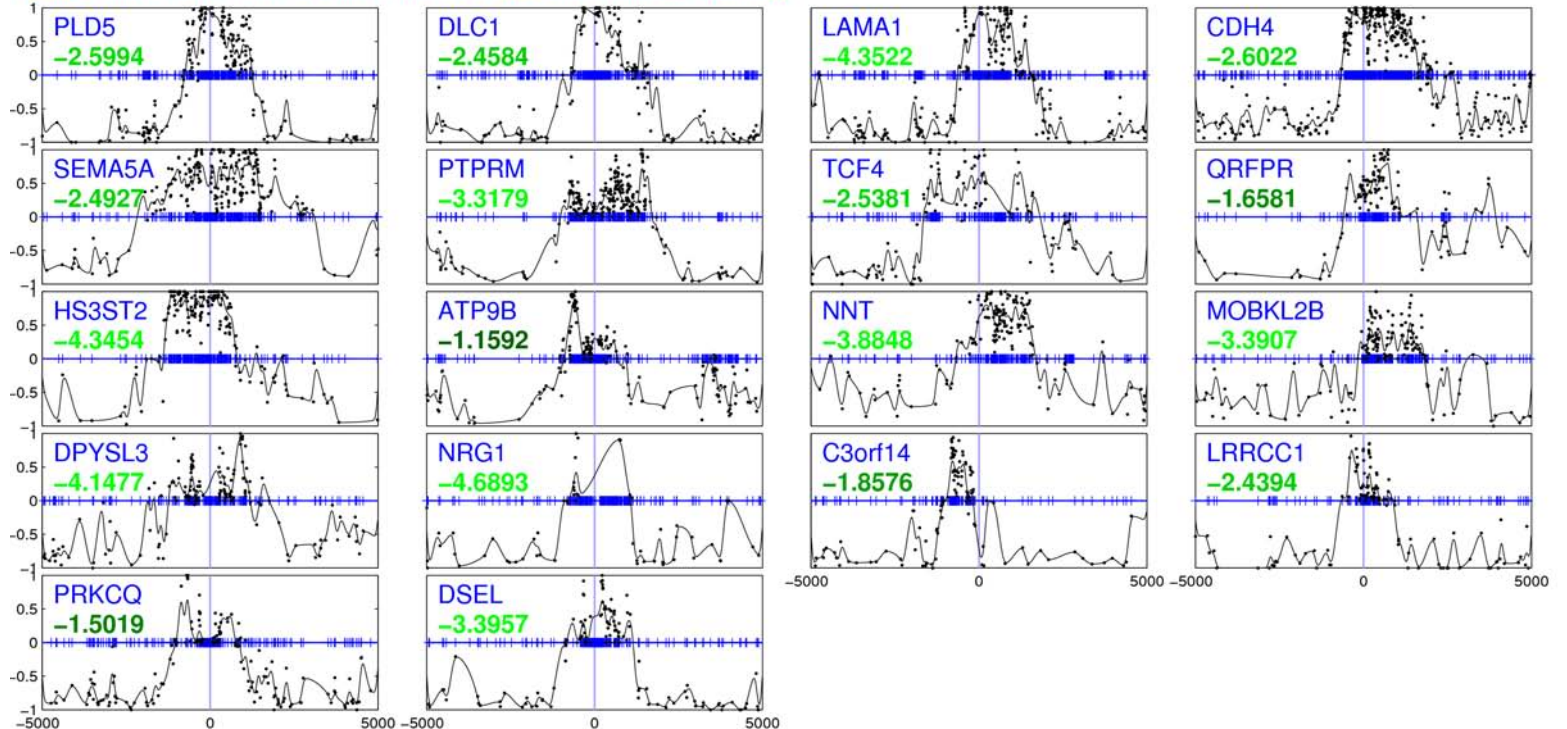

Cluster 5, pval = 0.00040535, size = 18

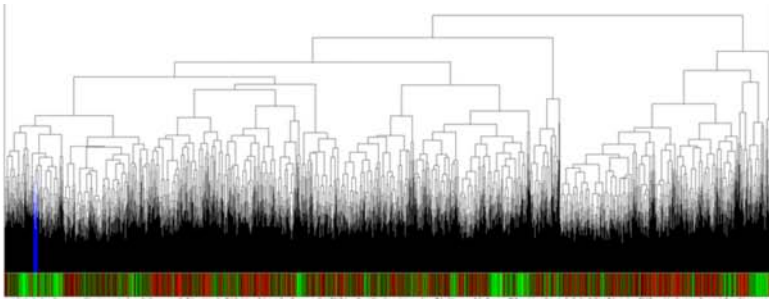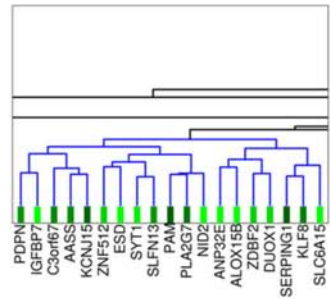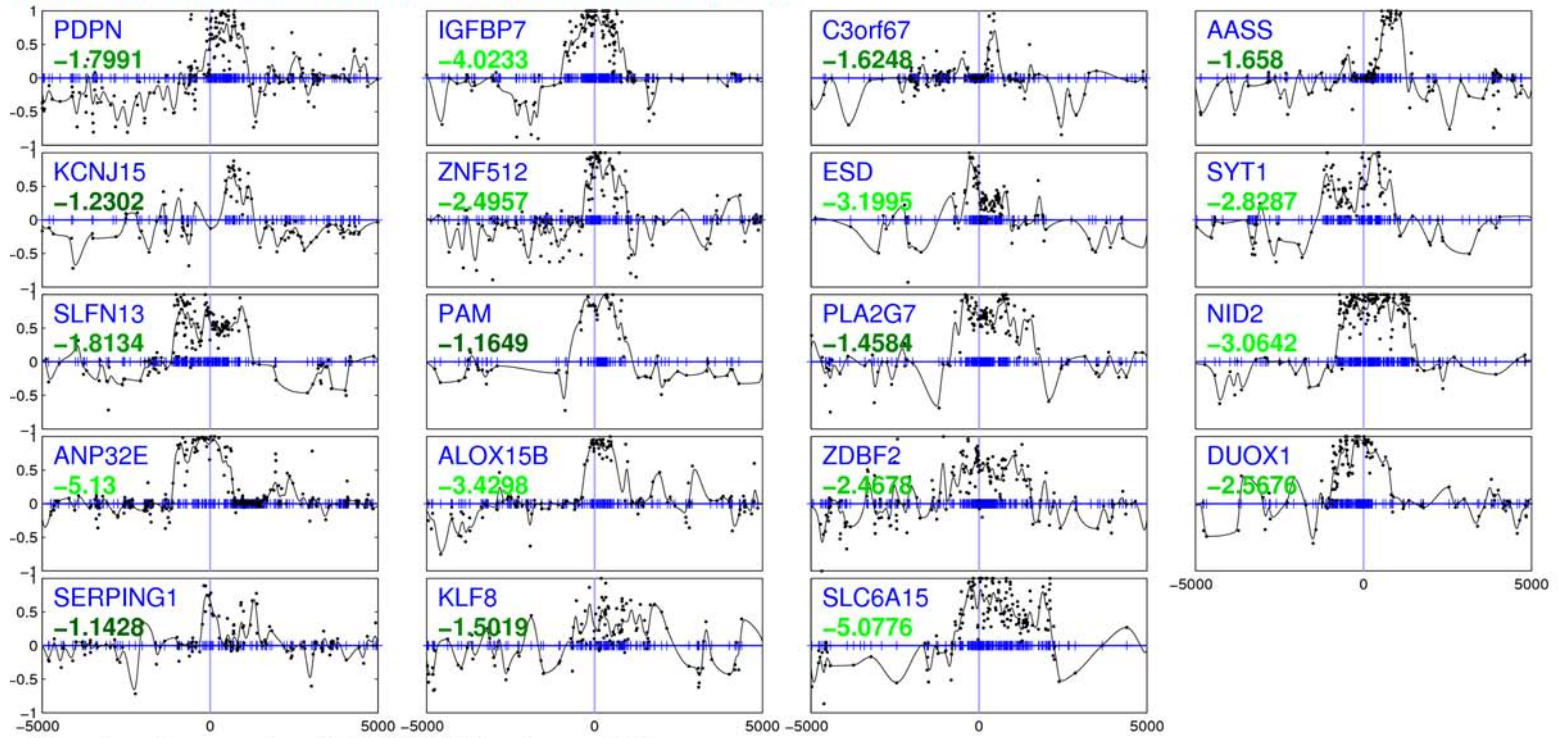

Cluster 6, pval = 0.0011292, size = 19



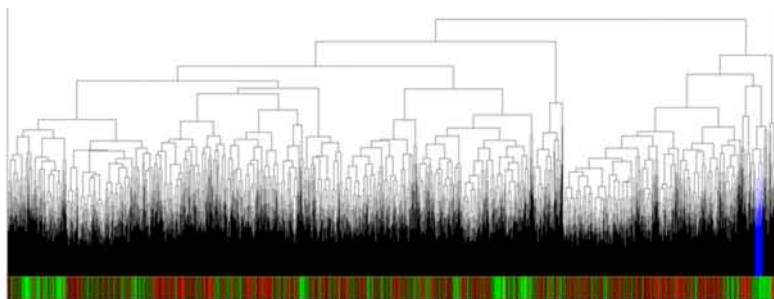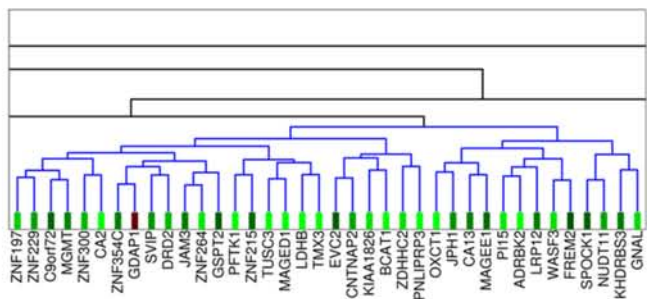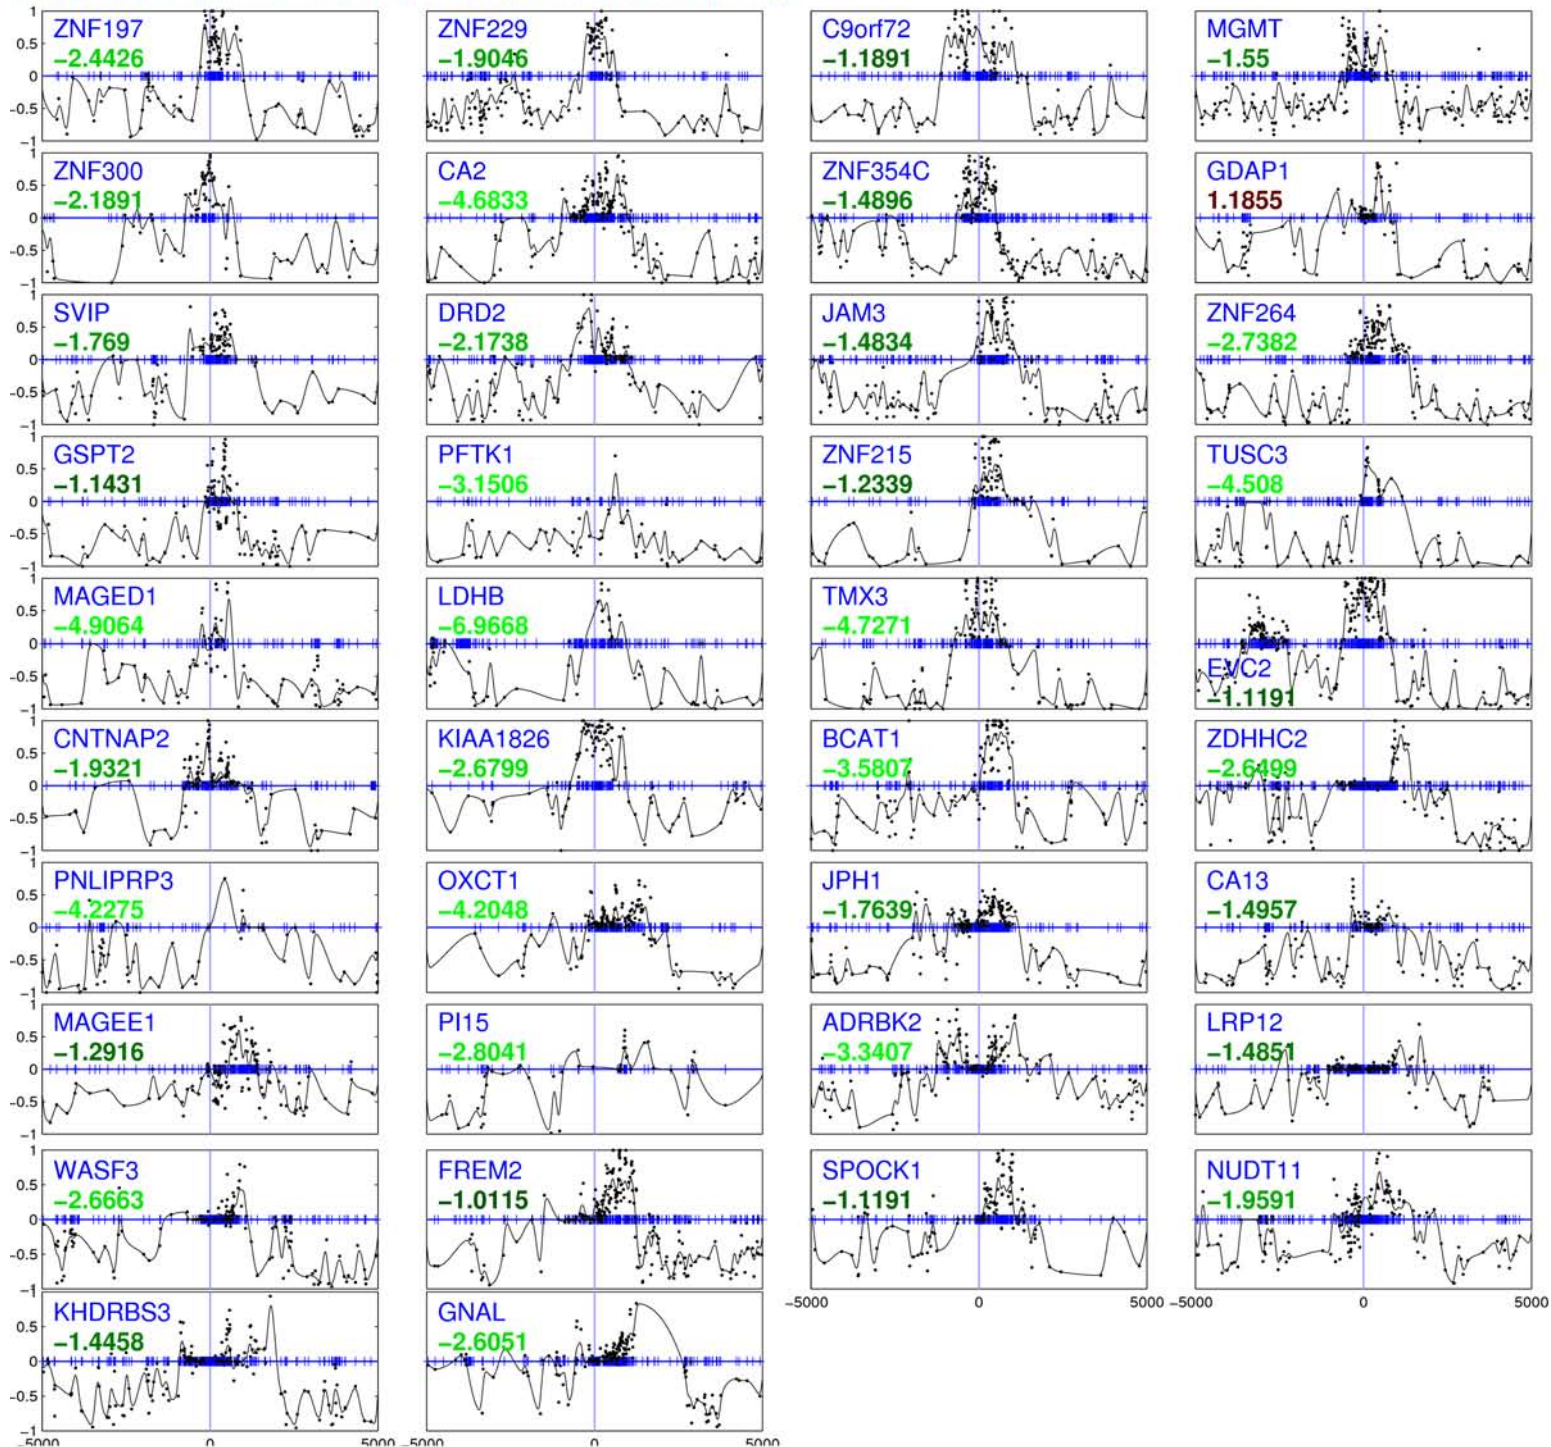

Cluster 7, pval = 9.8829e-06, size = 38



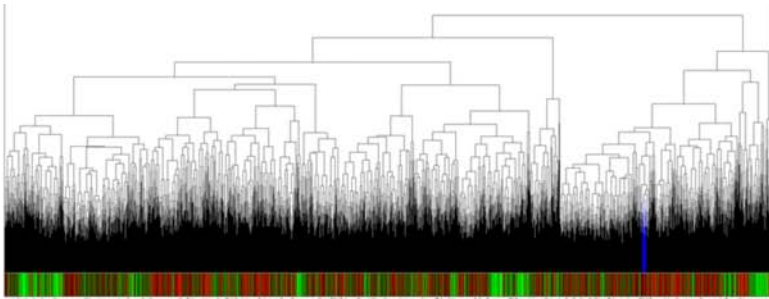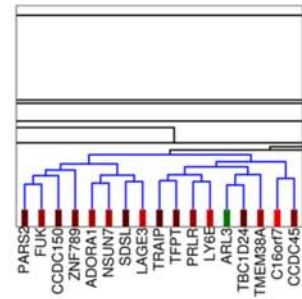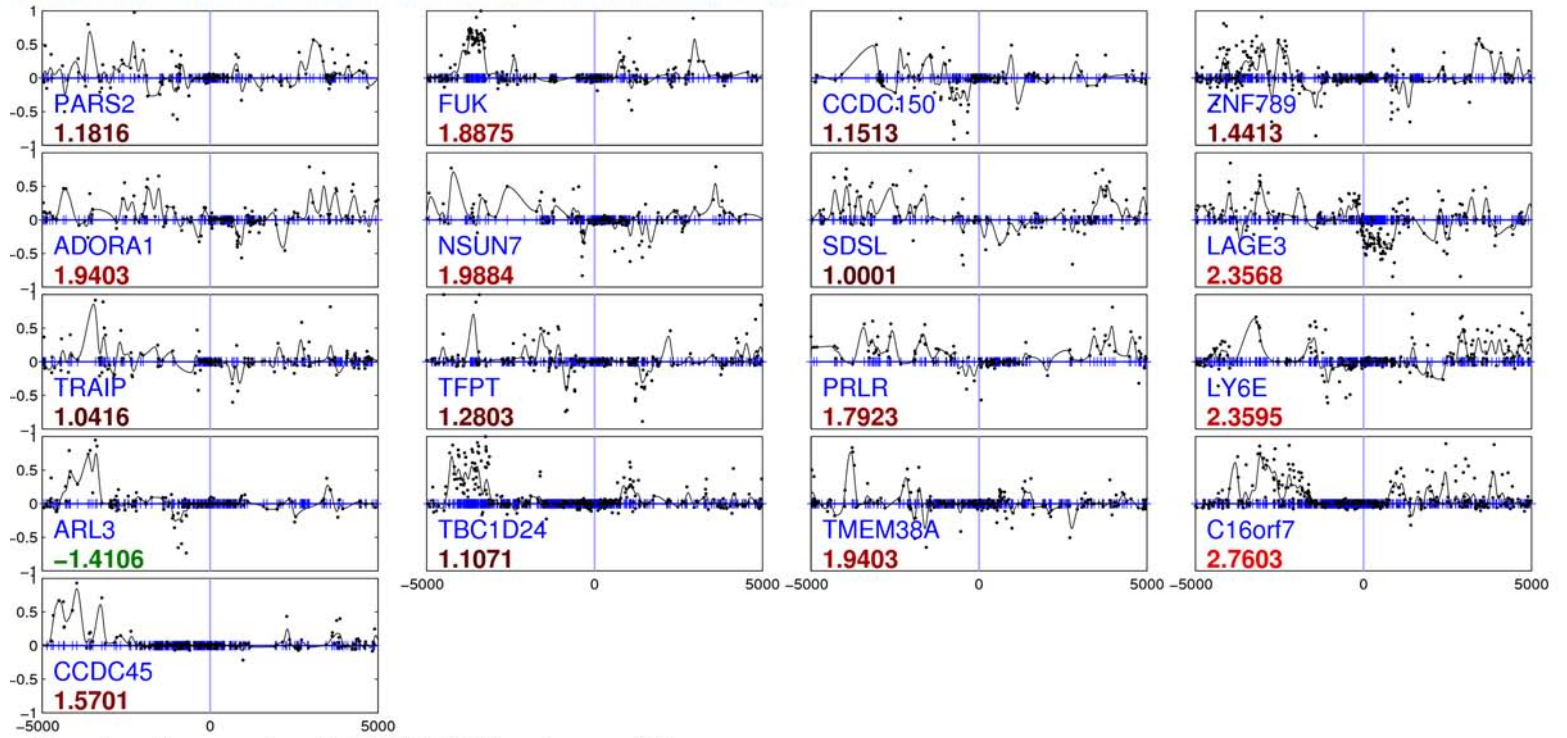

Cluster 8, pval = 0.00098184, size = 17

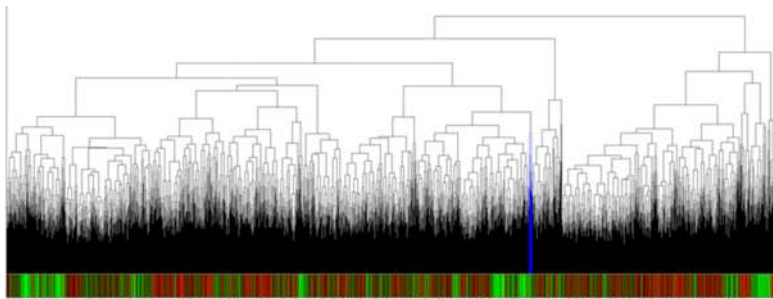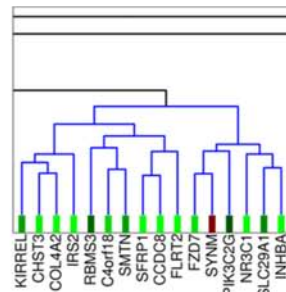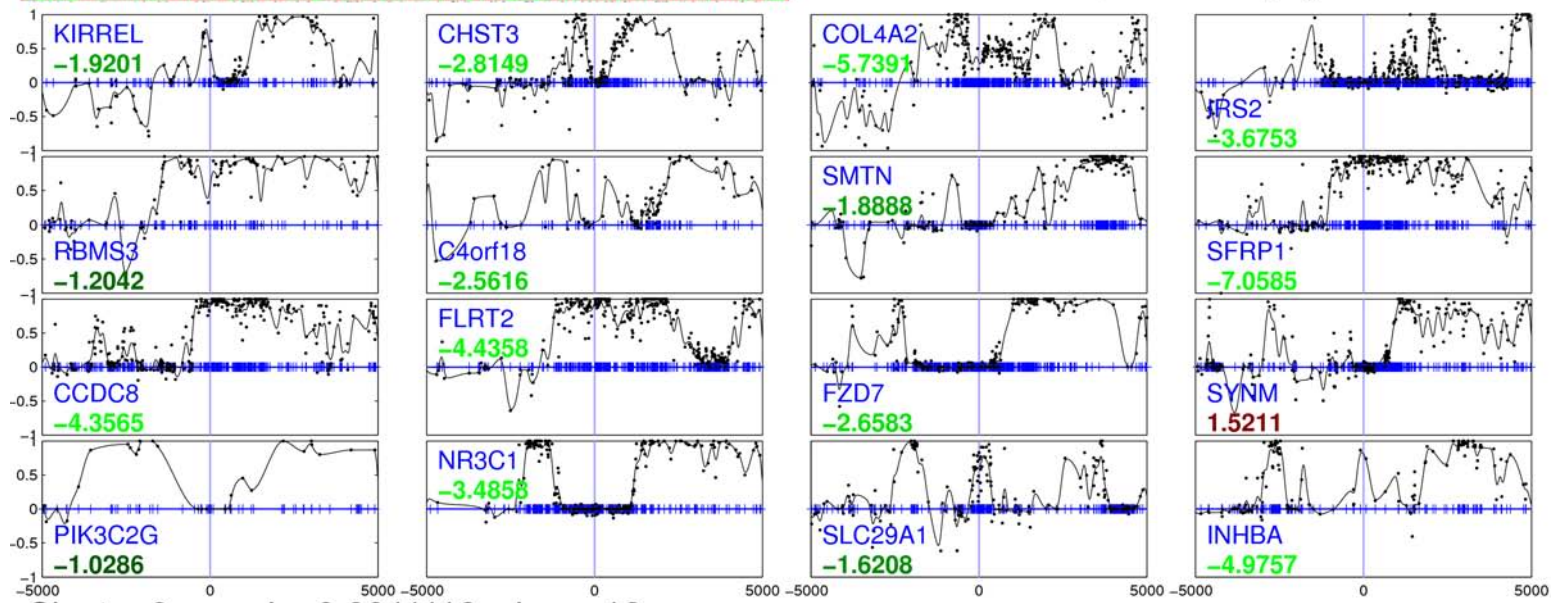

Cluster 9, pval = 0.0011116, size = 16

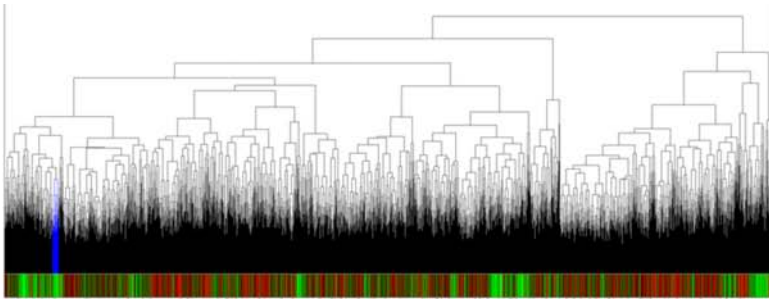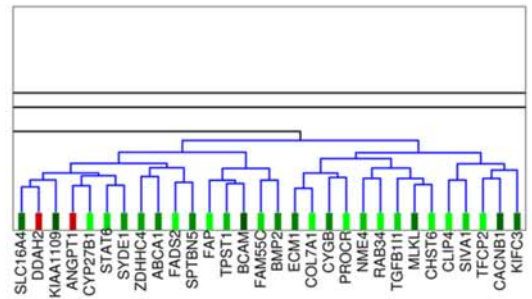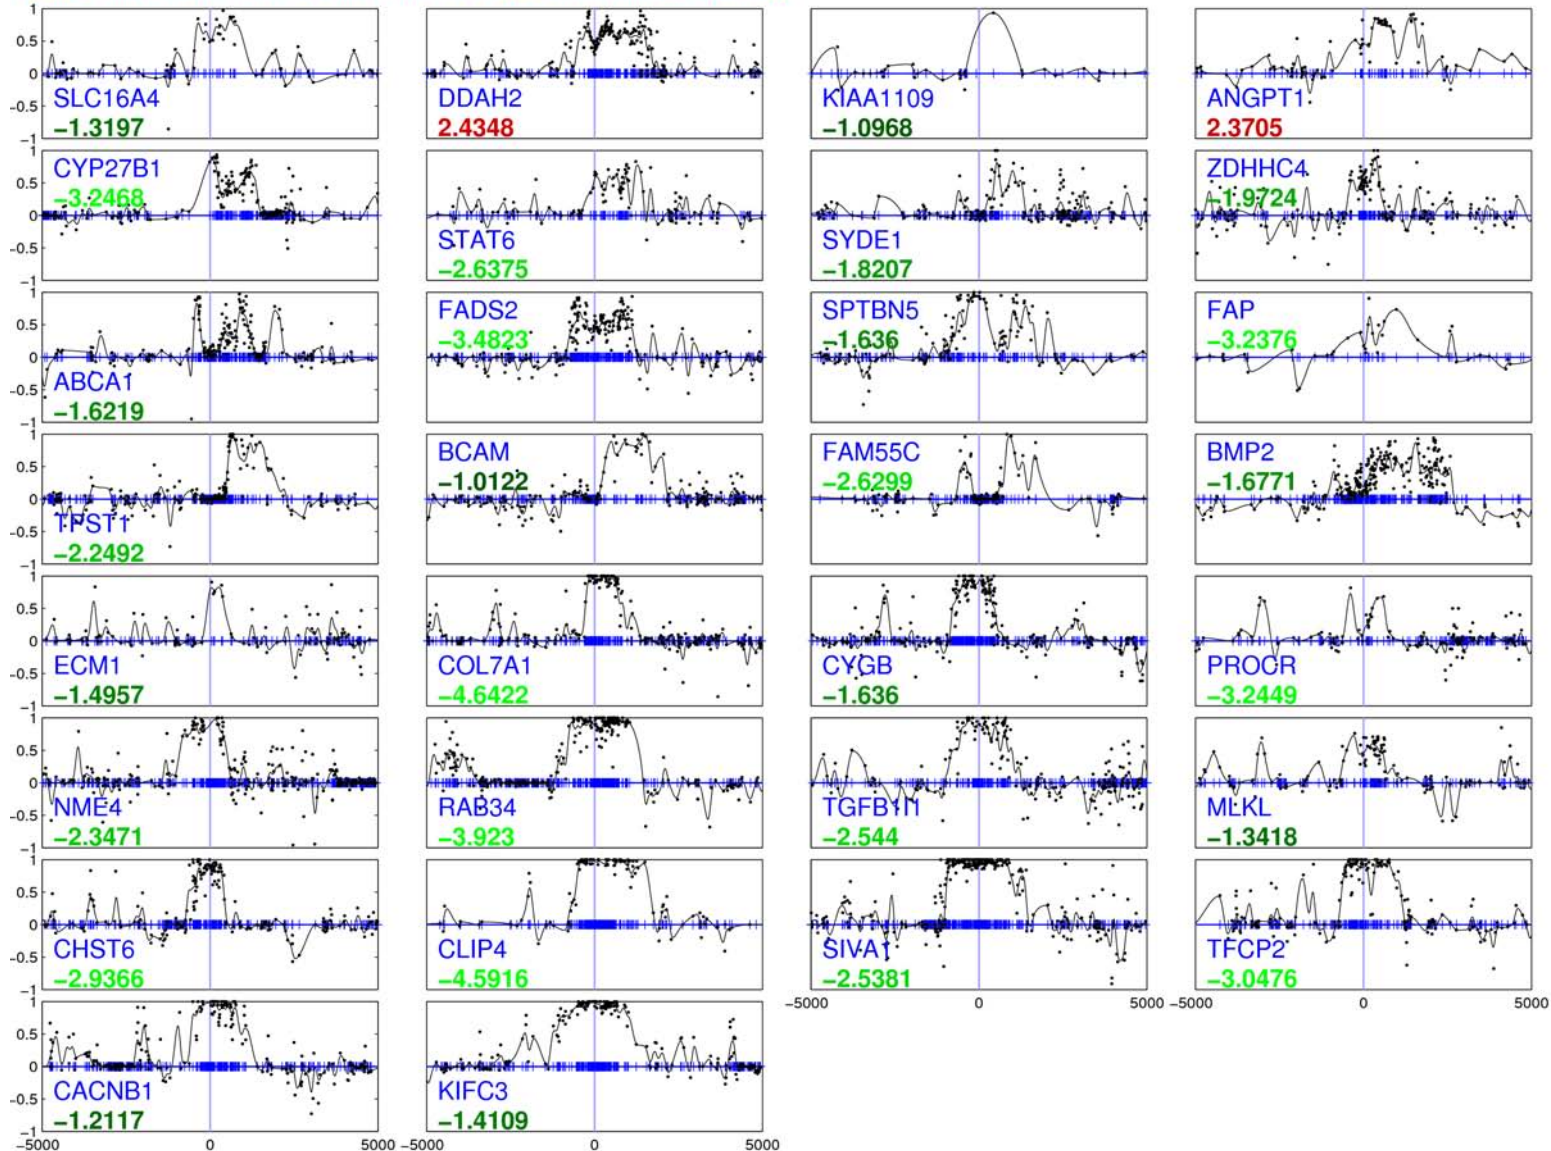

Cluster 10, pval = 0.00091279, size = 30



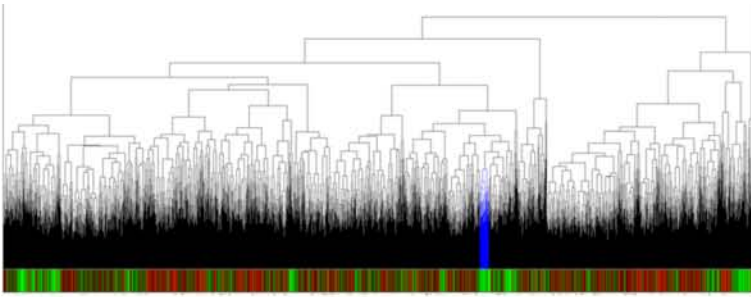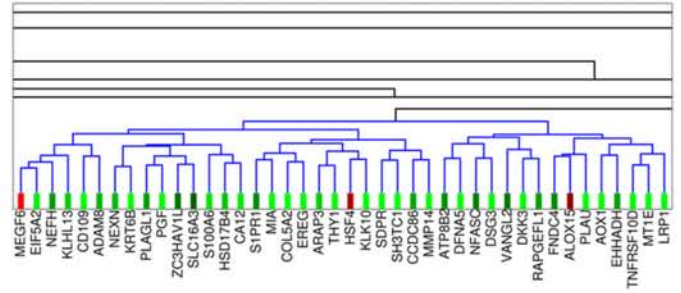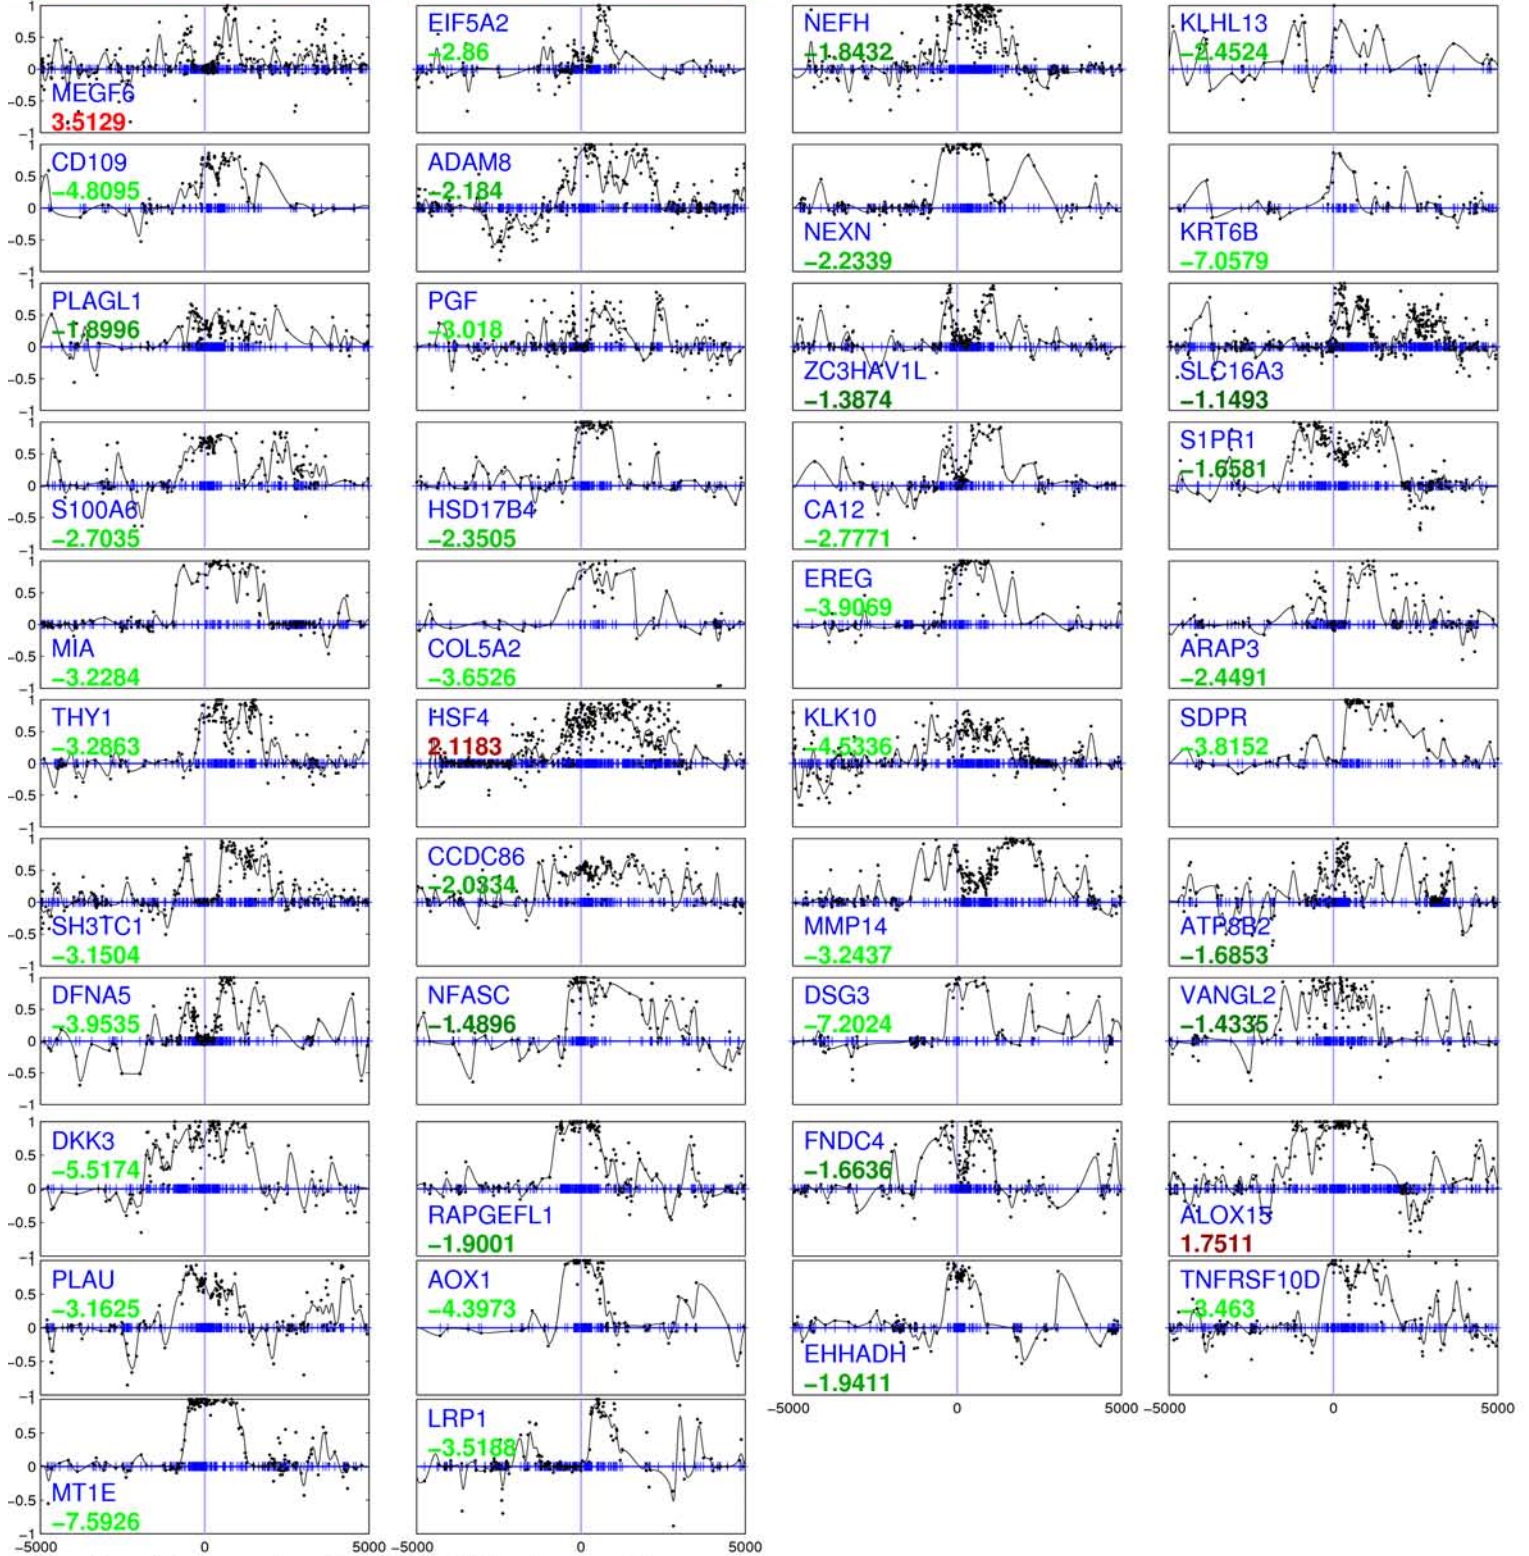

Cluster 11, pval = 0.0062485, size = 42



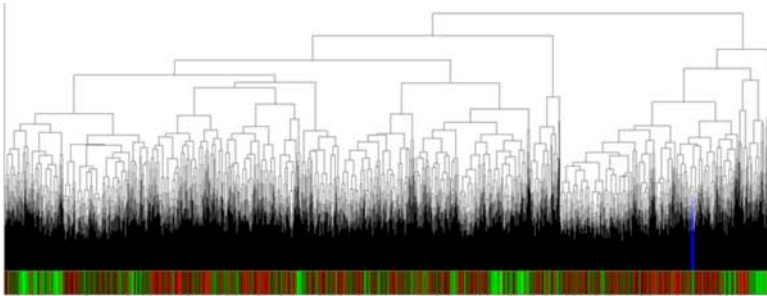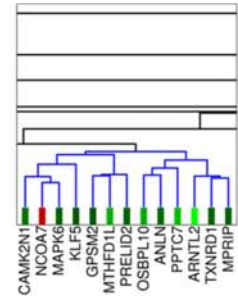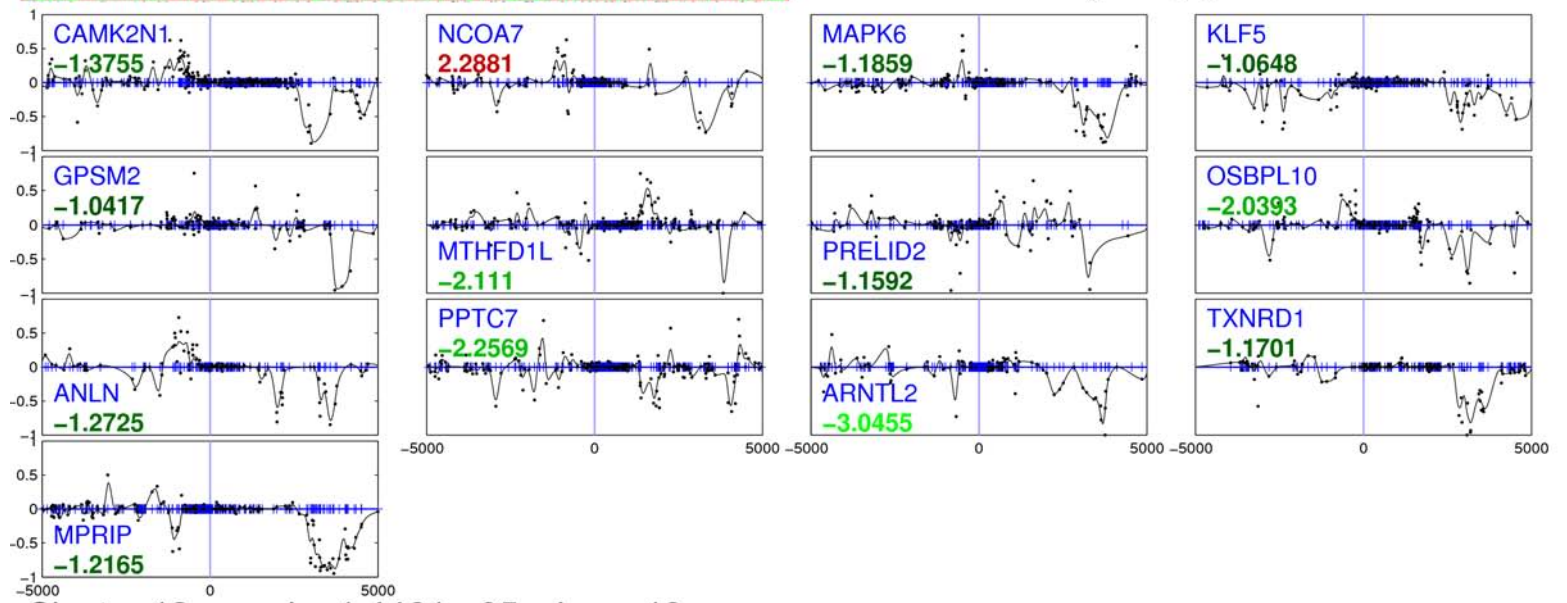

Cluster 12, pval = 1.4461e-05, size = 13

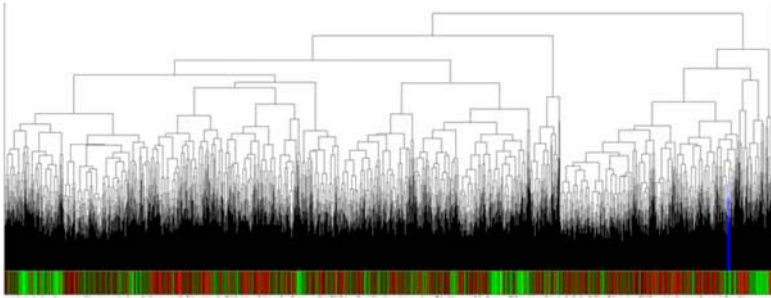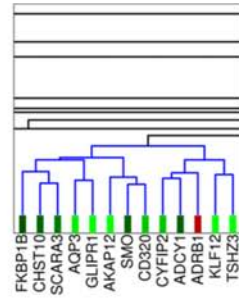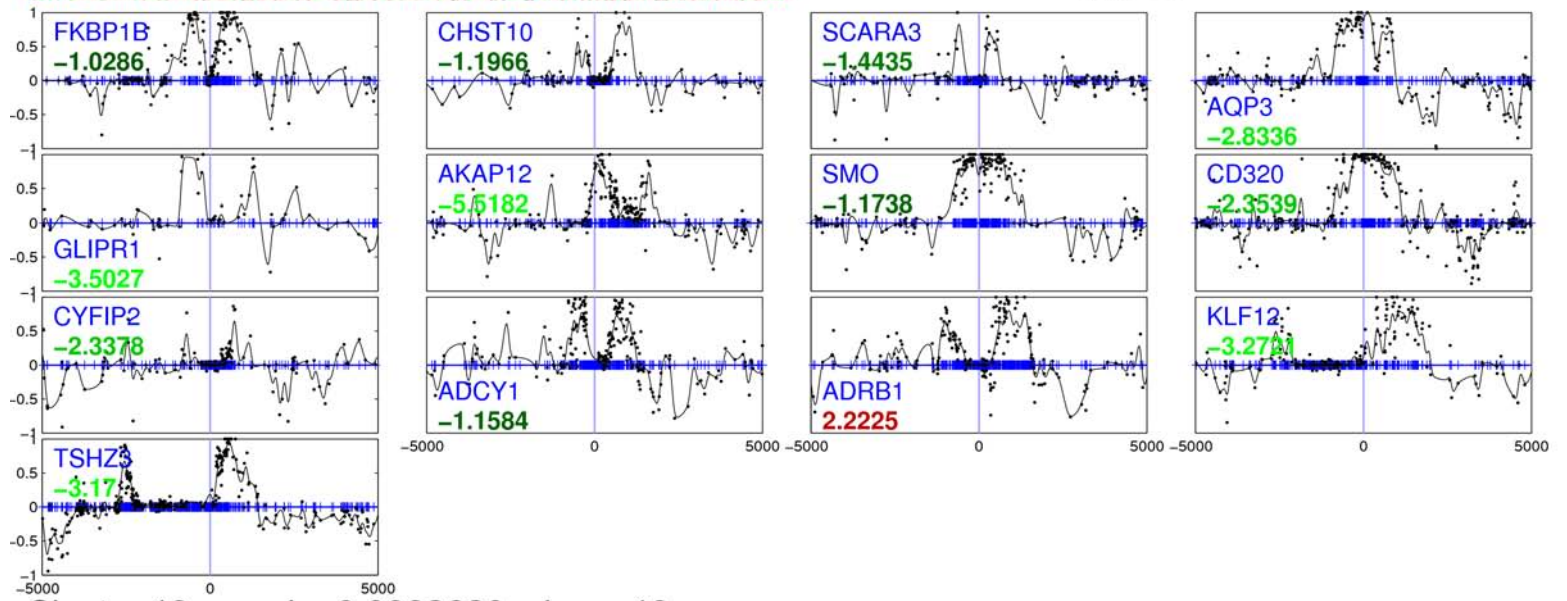

Cluster 13, pval = 0.0082623, size = 13

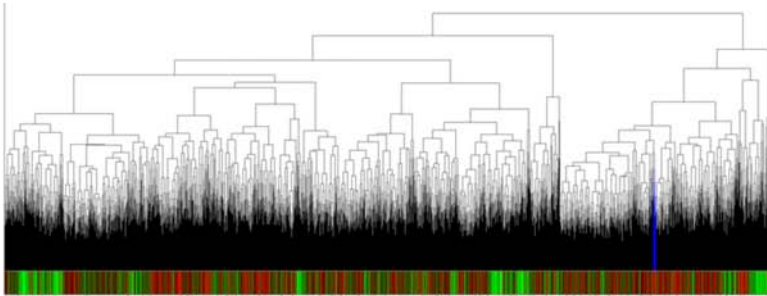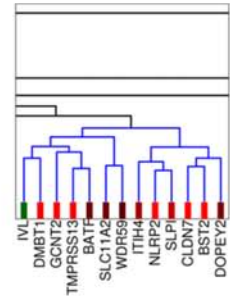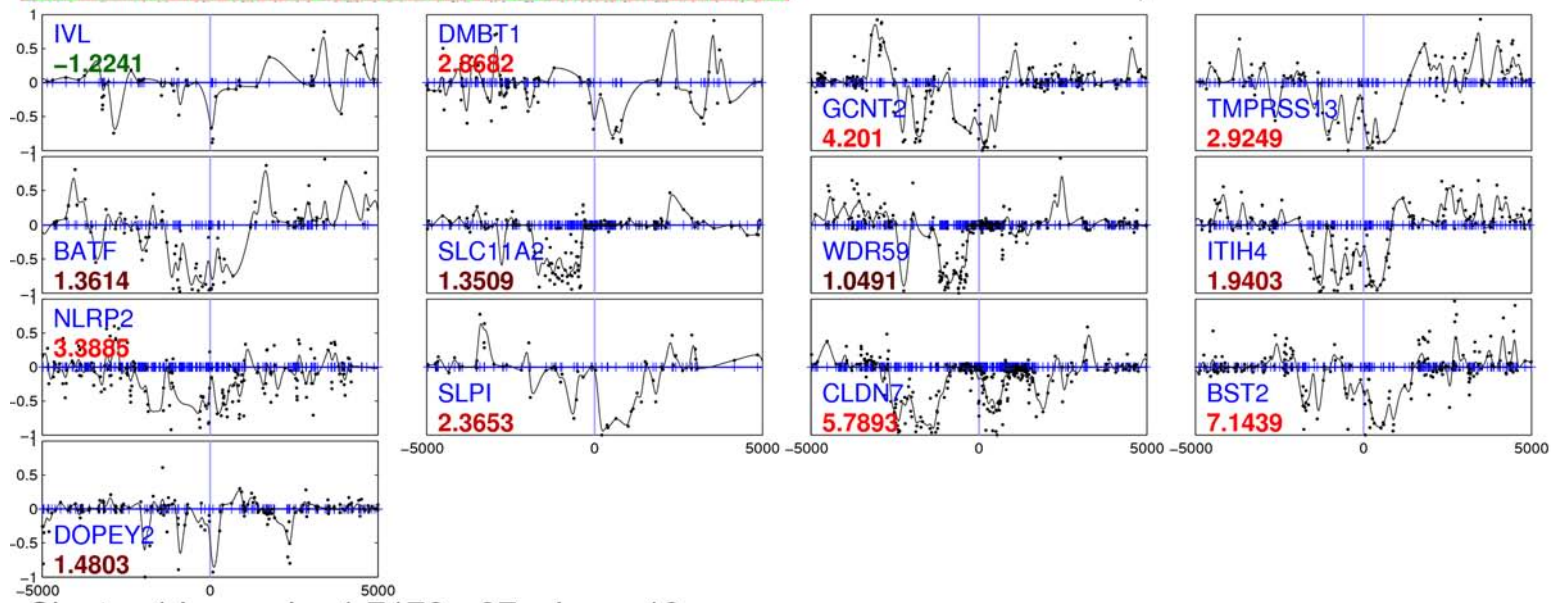

Cluster 14, pval = 1.7178e-07, size = 13

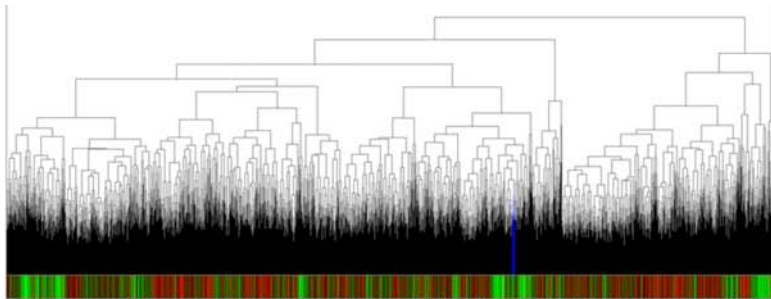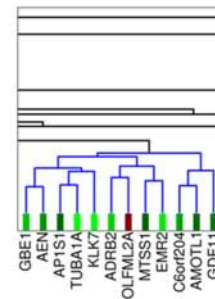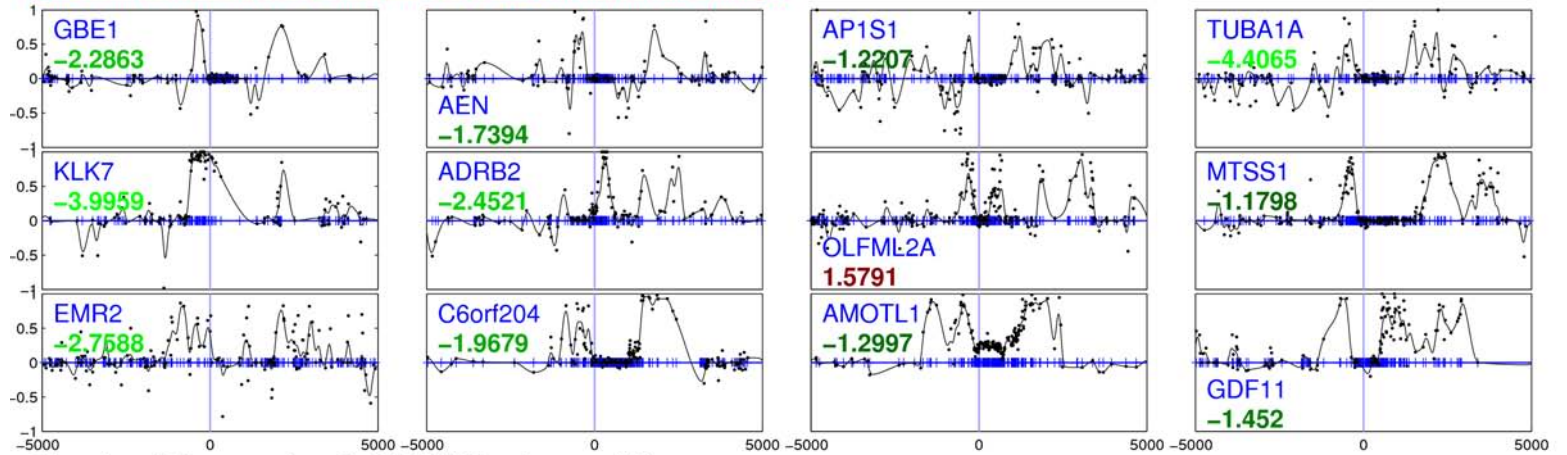

Cluster 15, pval = 0.010638, size = 12



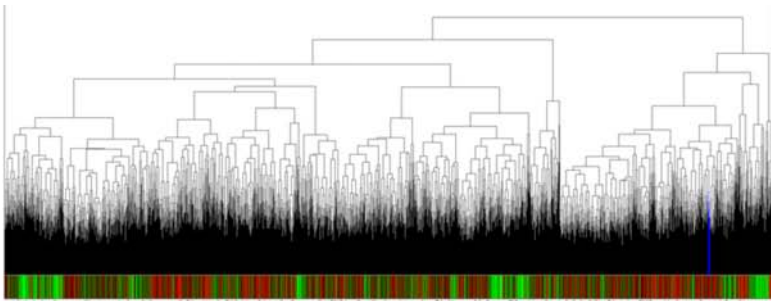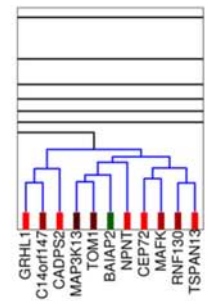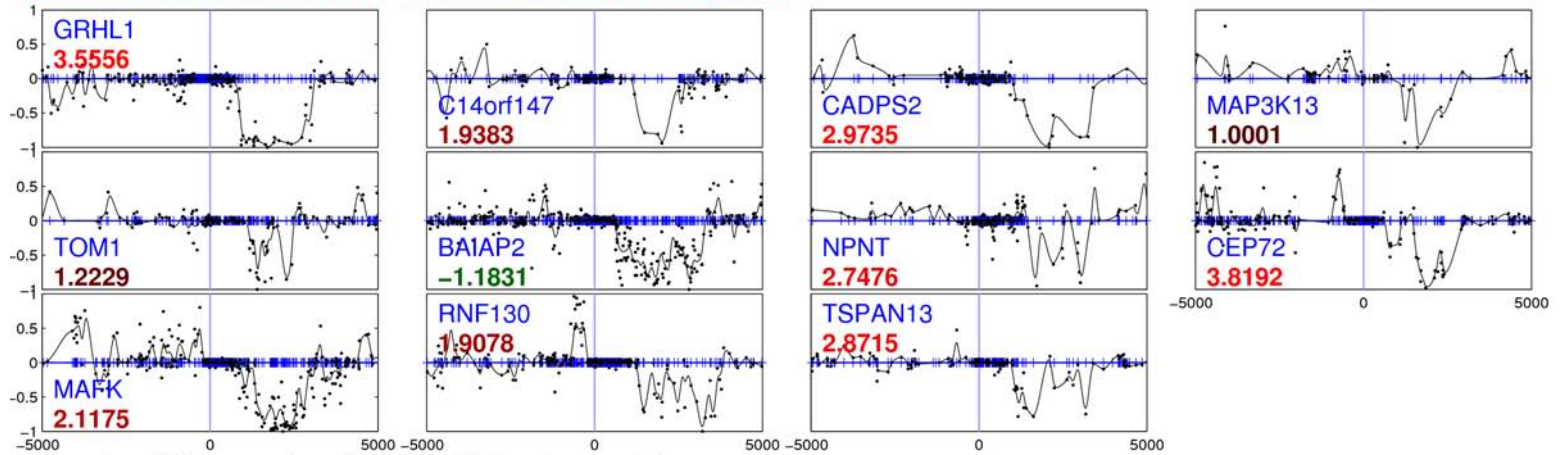

Cluster 16, pval = 0.0020204, size = 11

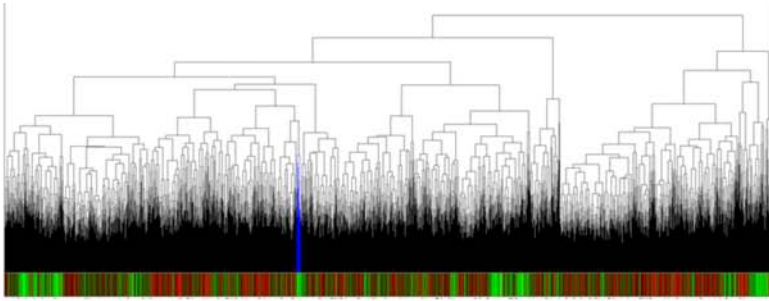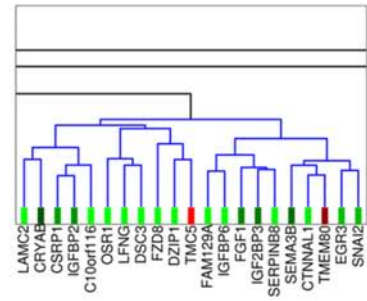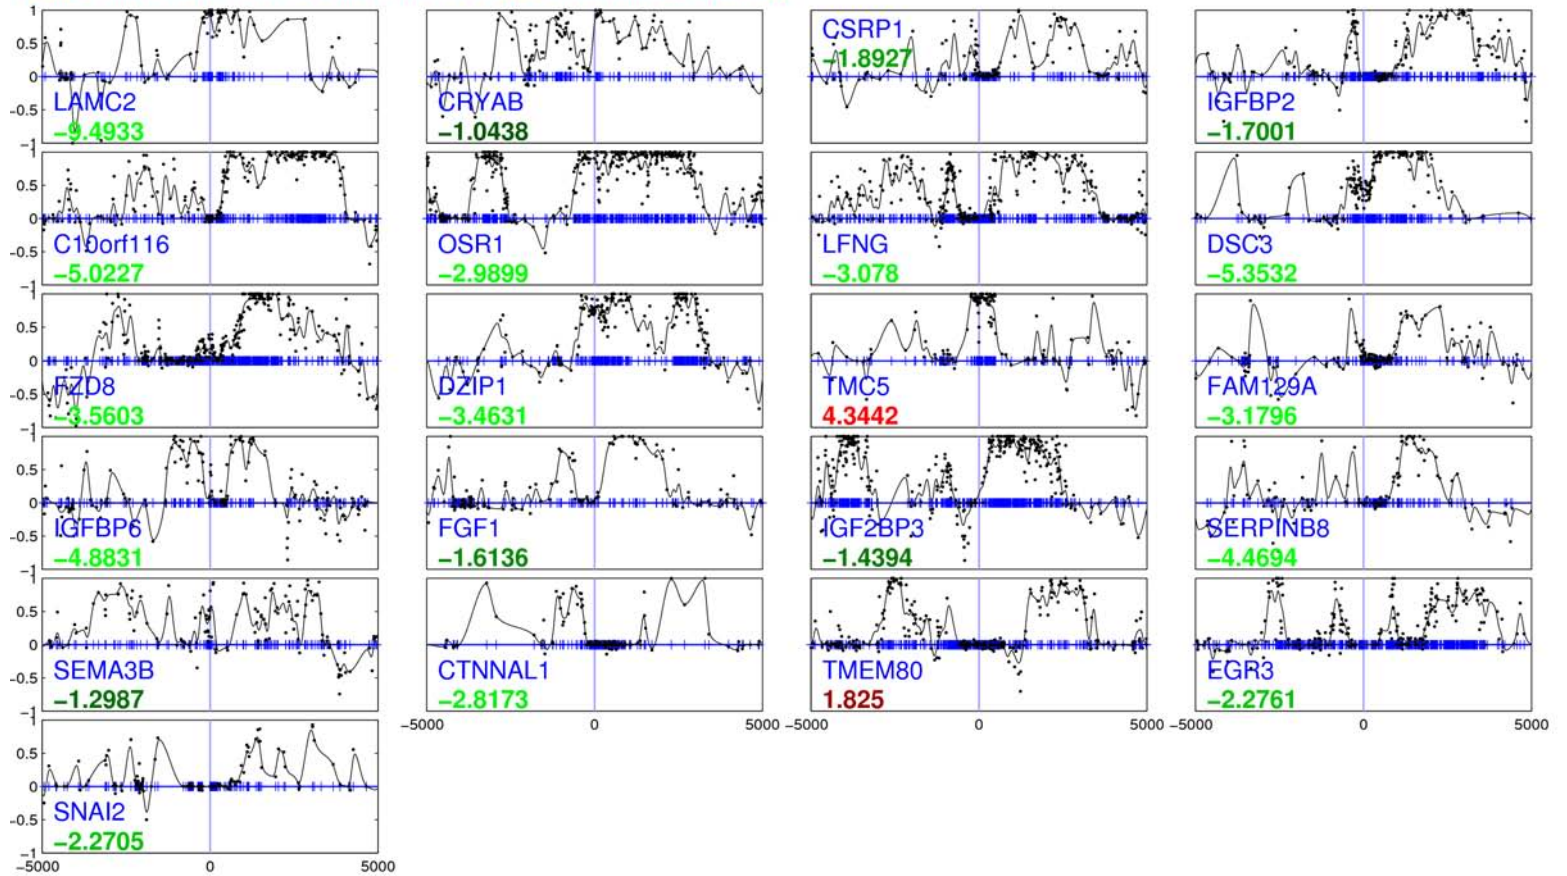

Cluster 17, pval = 0.00070033, size = 21

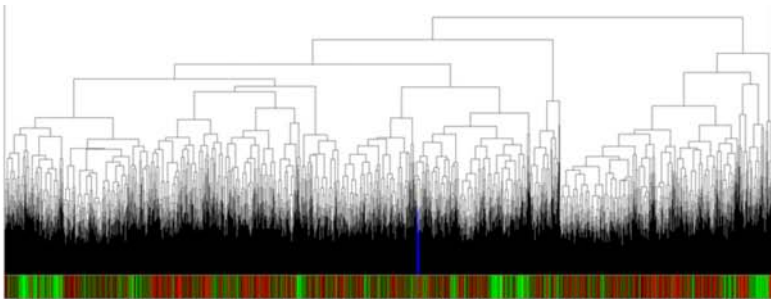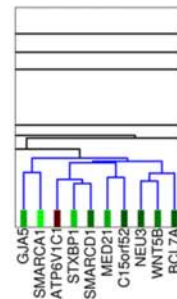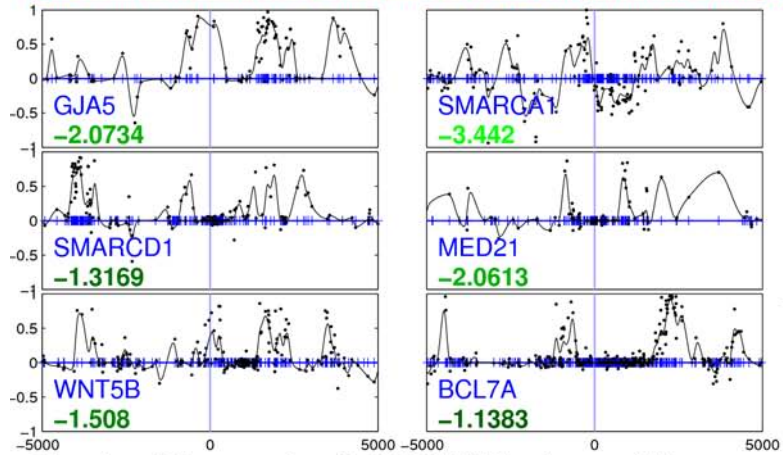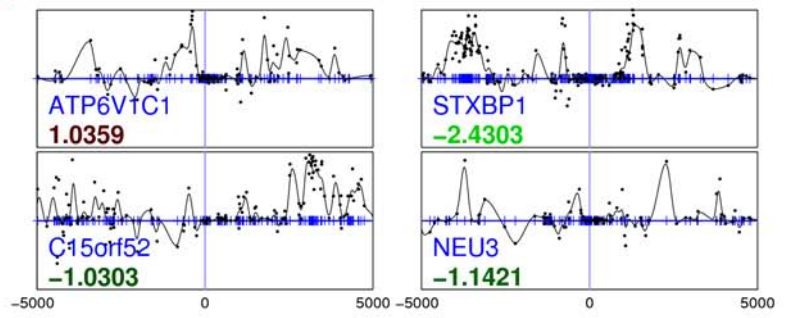

Cluster 18, pval = 0.0022203, size = 10

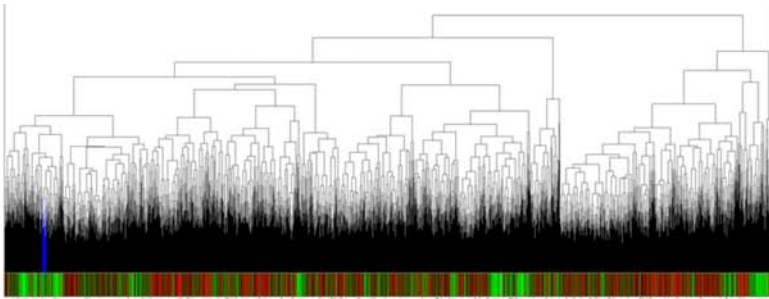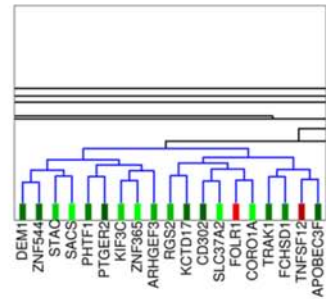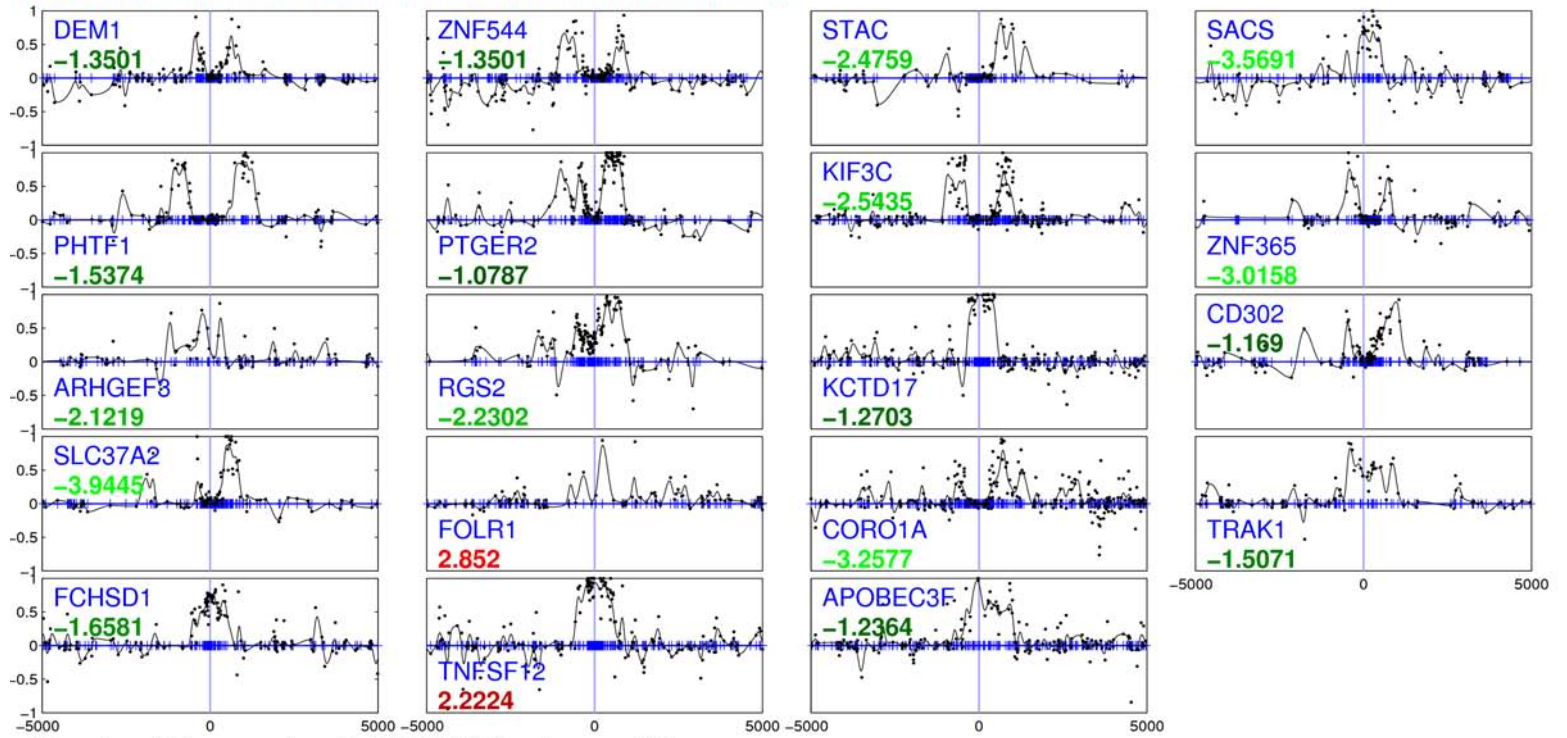

Cluster 19, pval = 0.0062516, size = 19



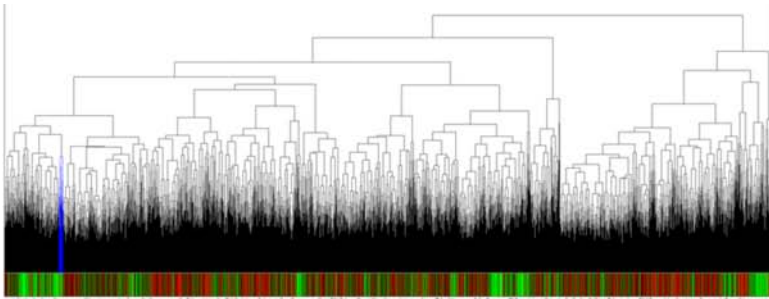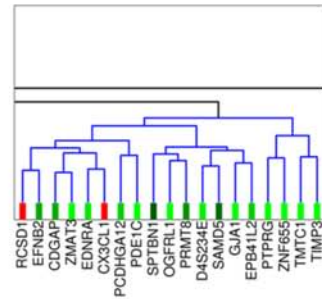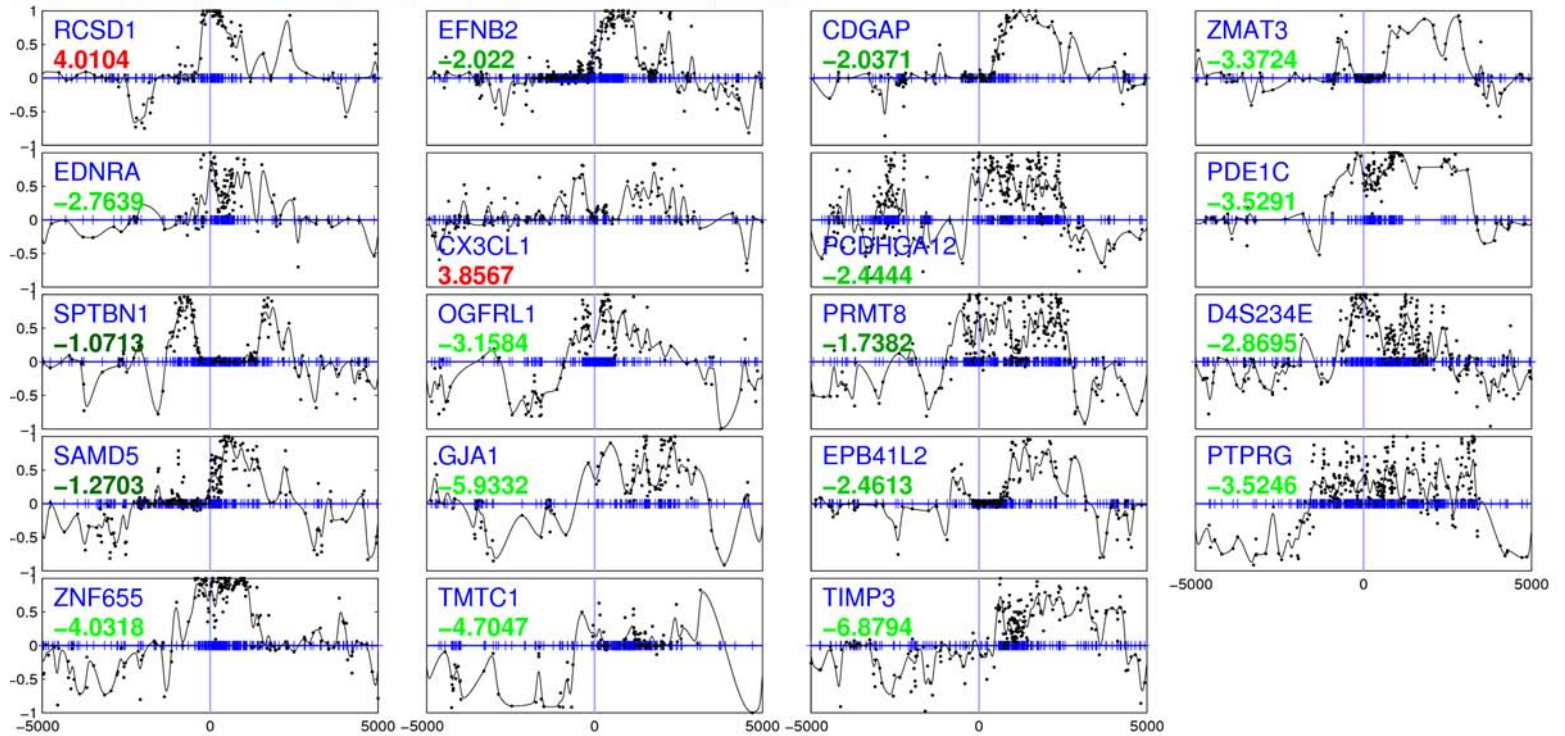

Cluster 20, pval = 0.0030639, size = 19

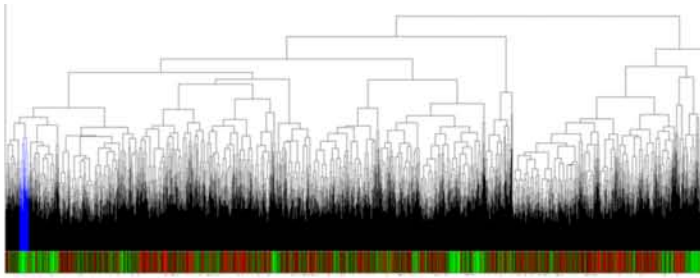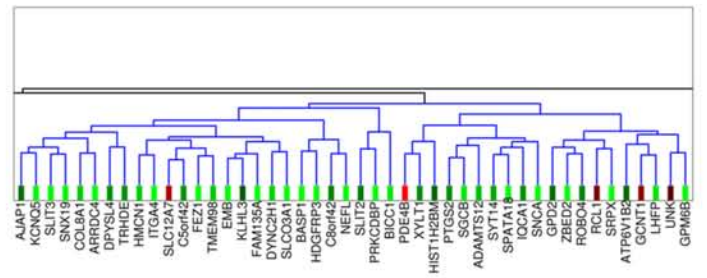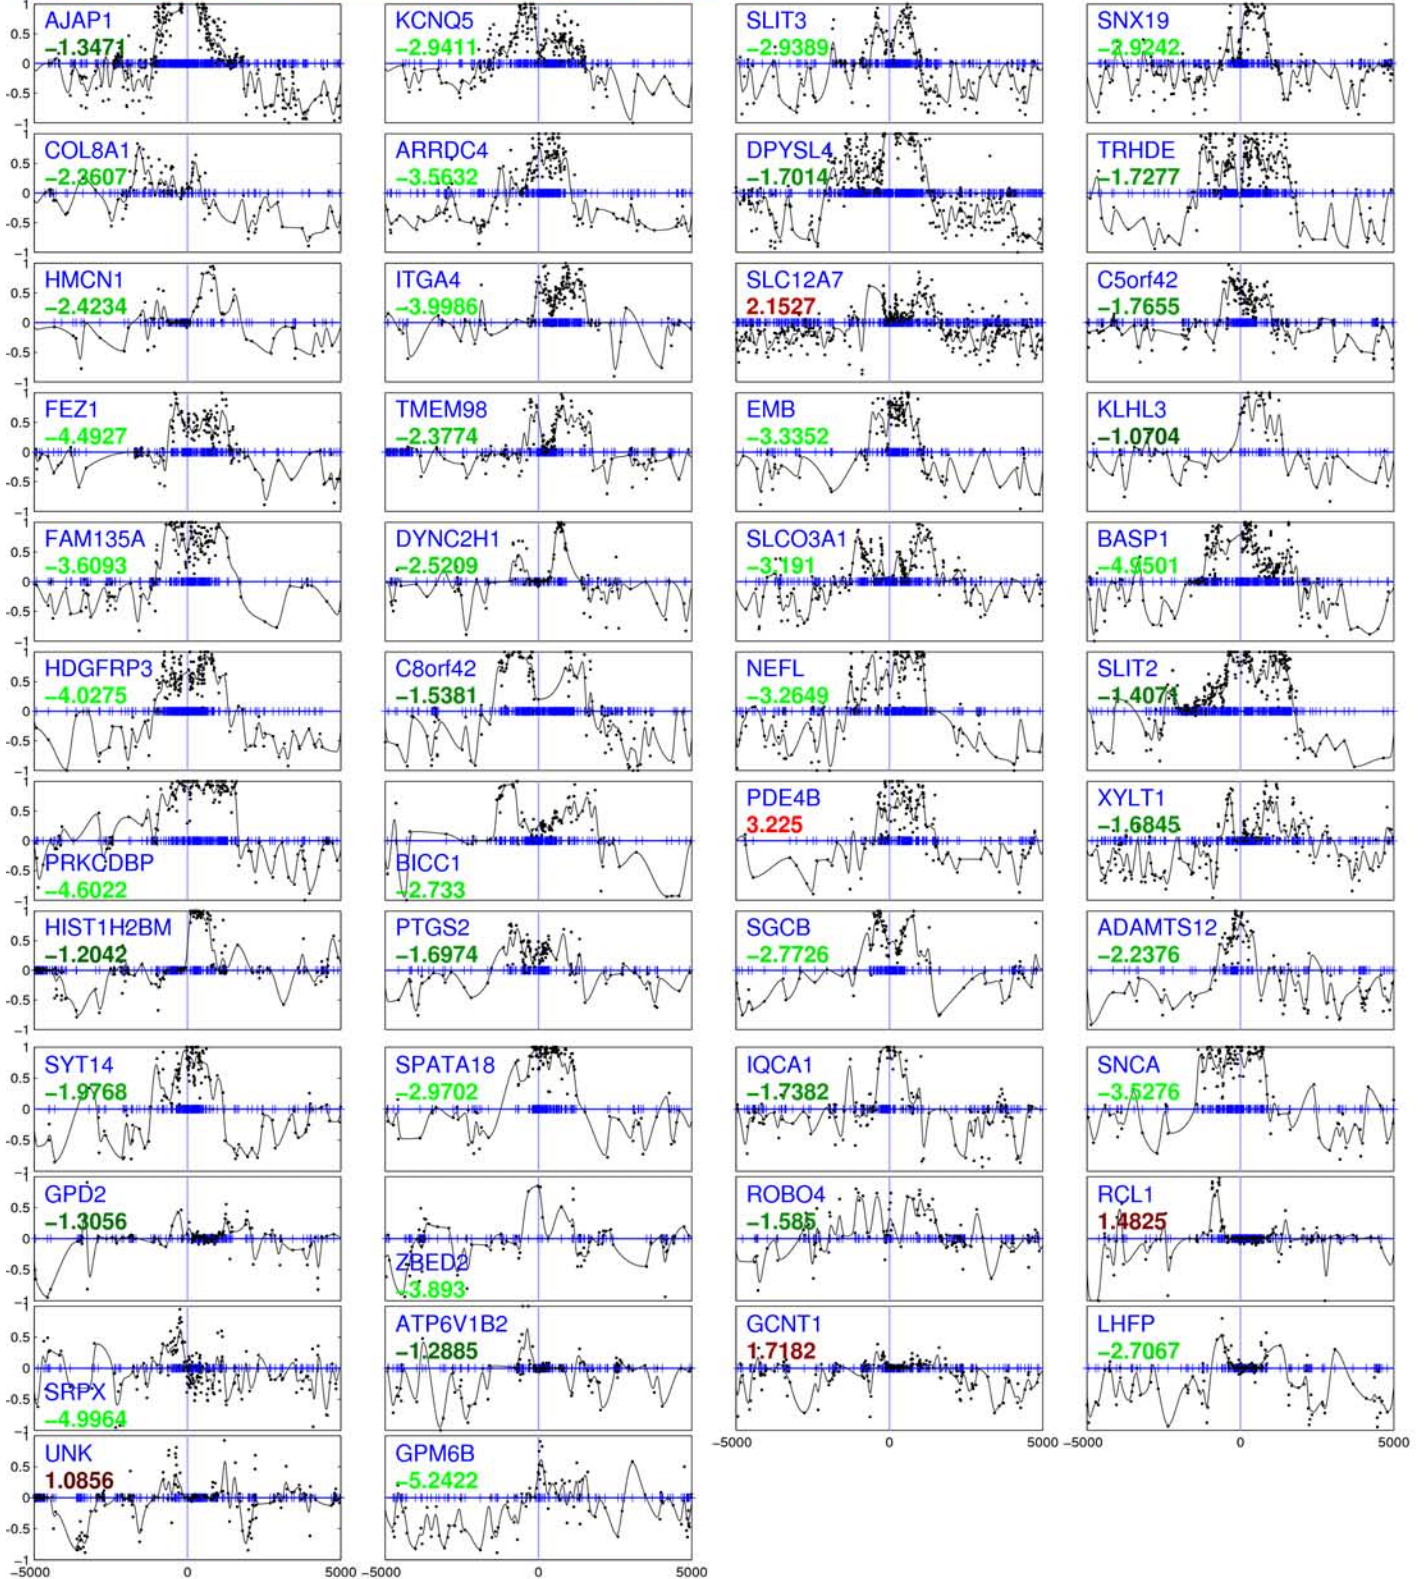

Cluster 21, pval = 0.0028159, size = 46



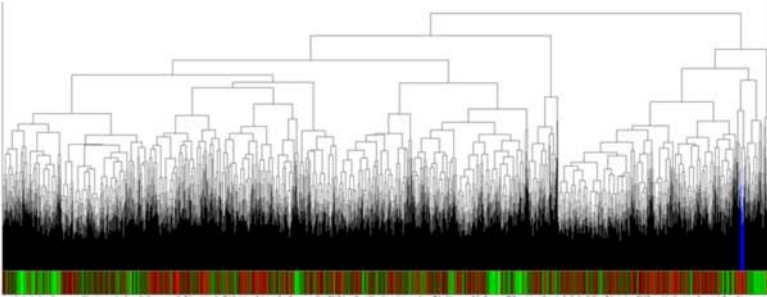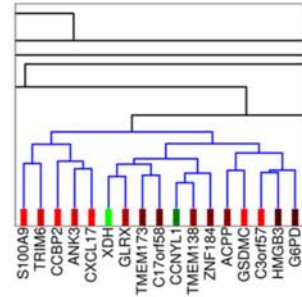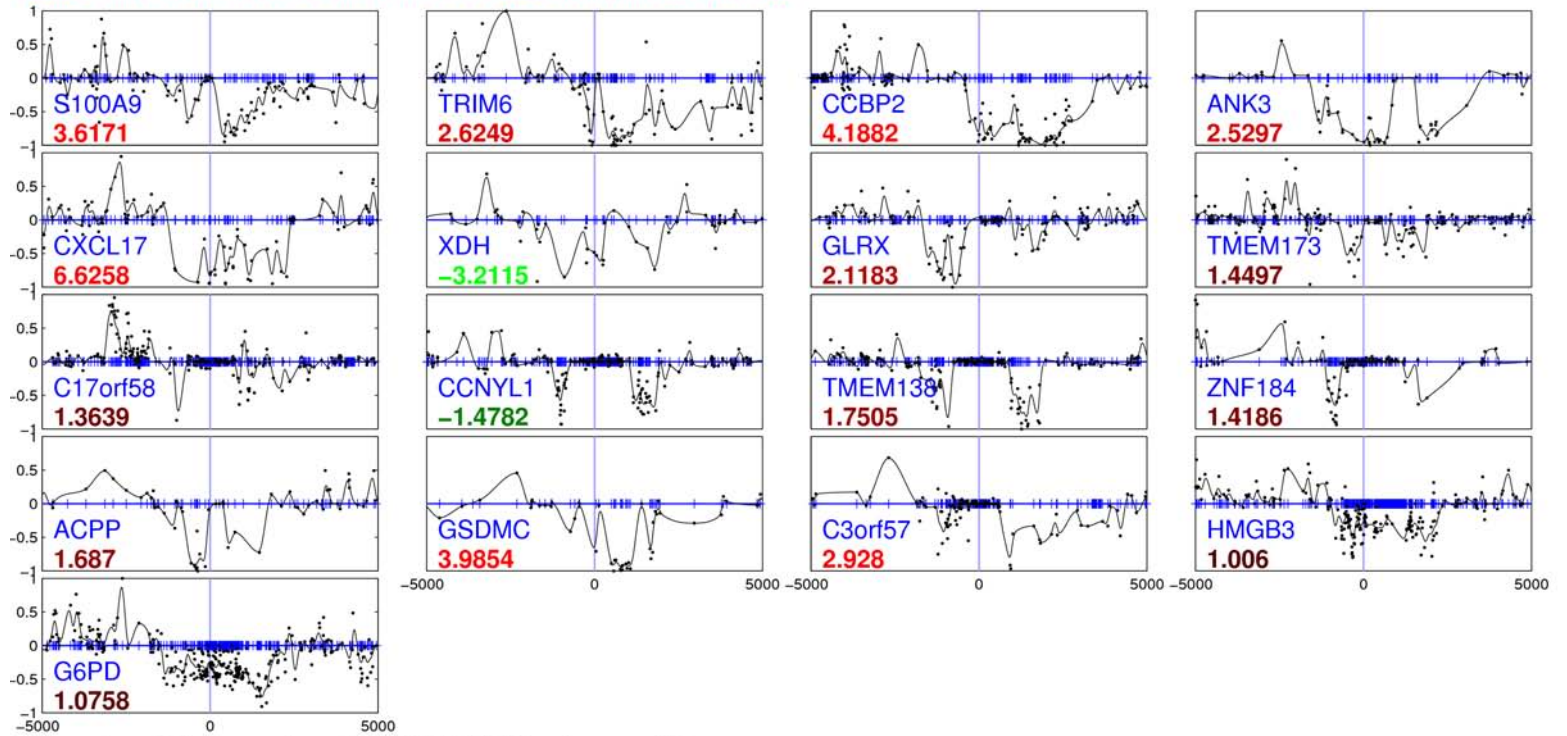

Cluster 22,  $pval = 0.00076372$ , size = 17



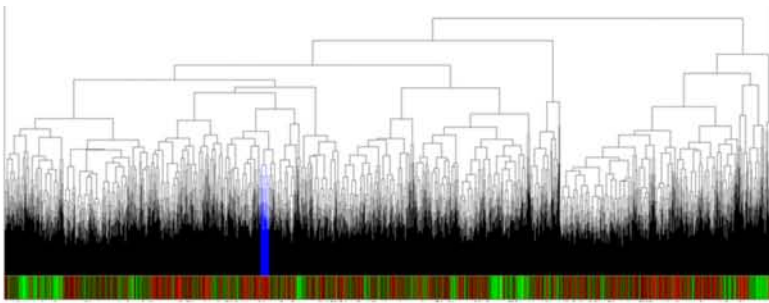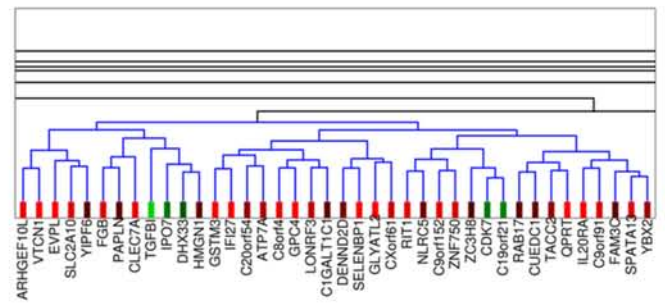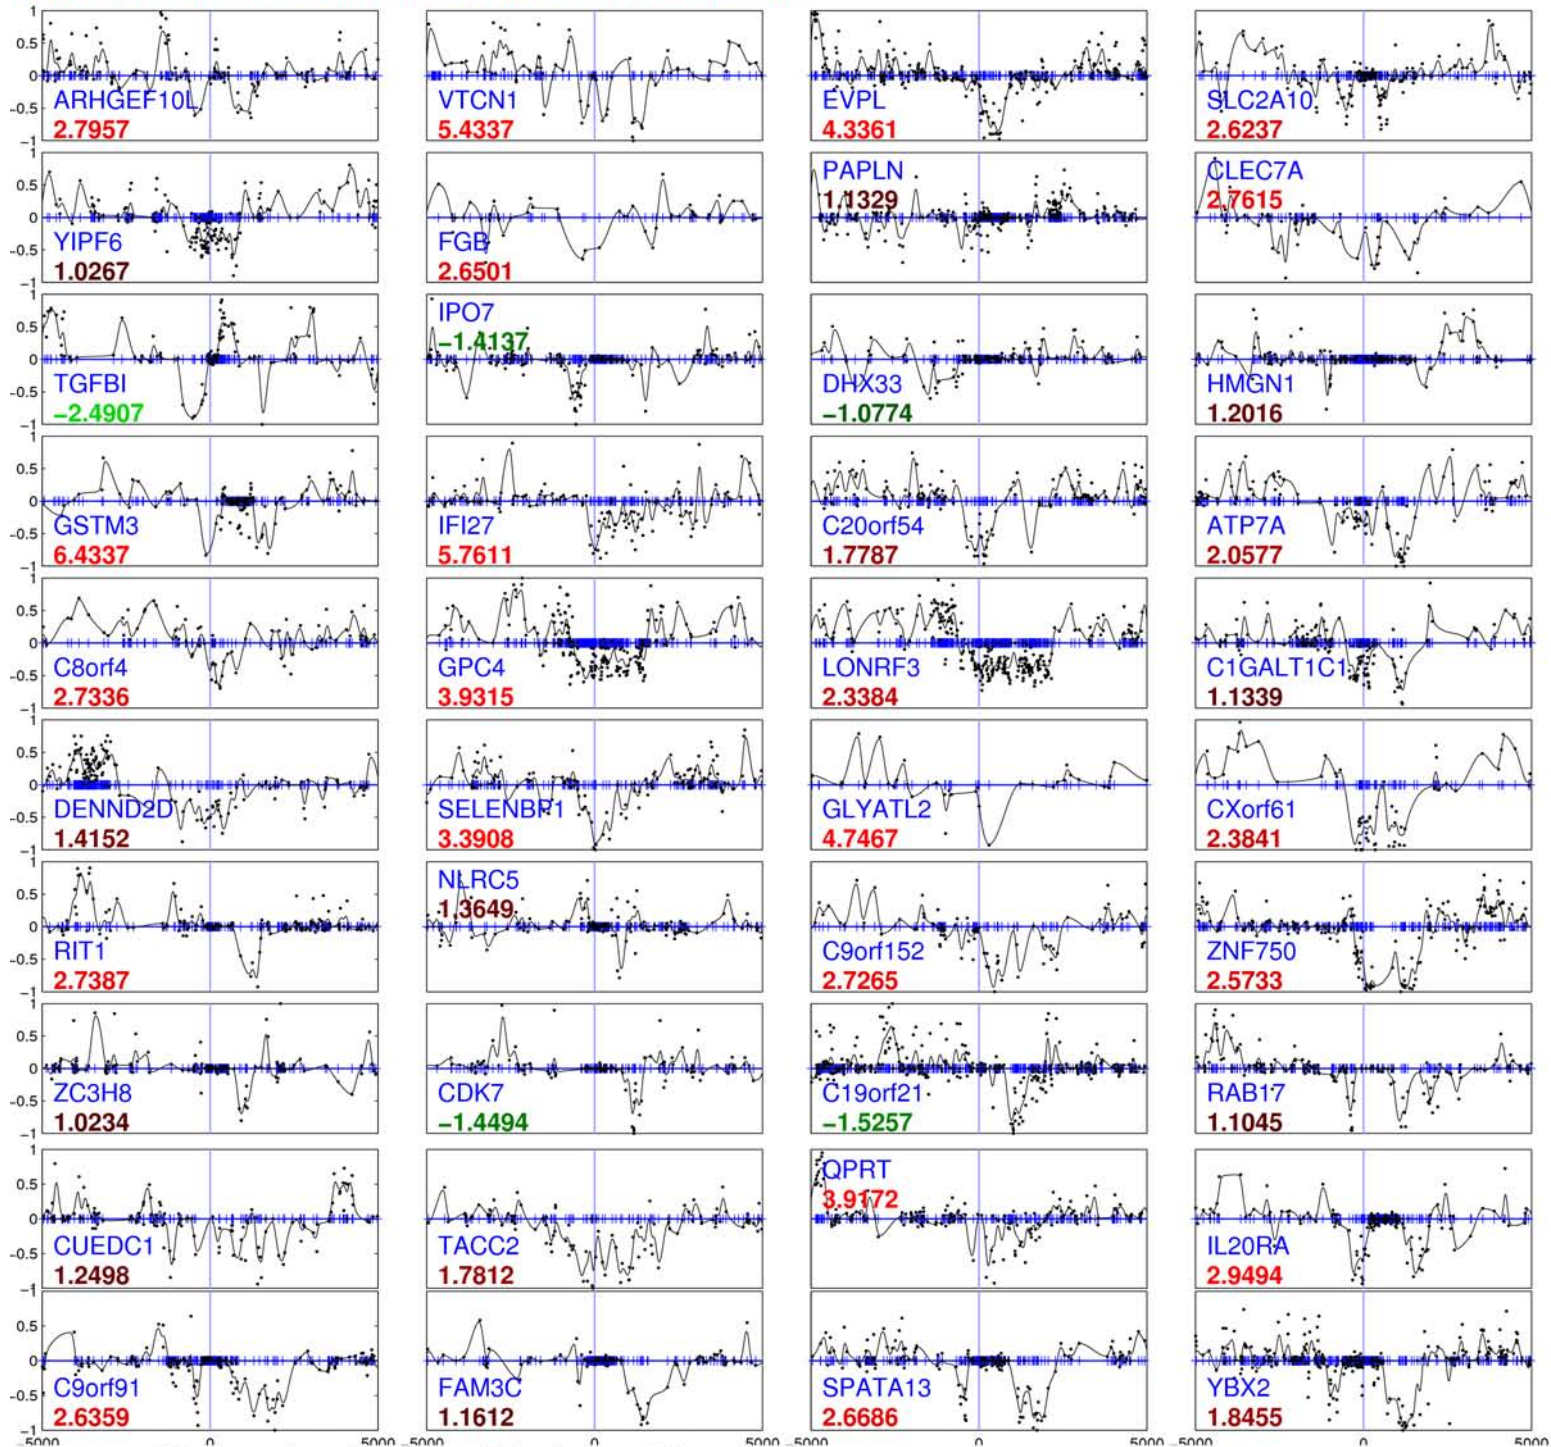

Cluster 23, pval = 4.8183e-08, size = 40

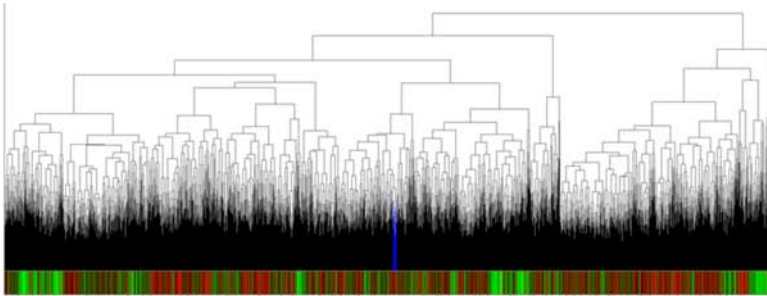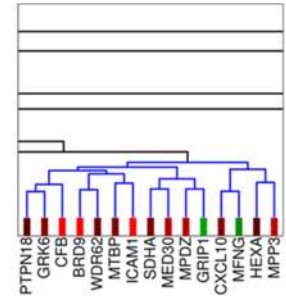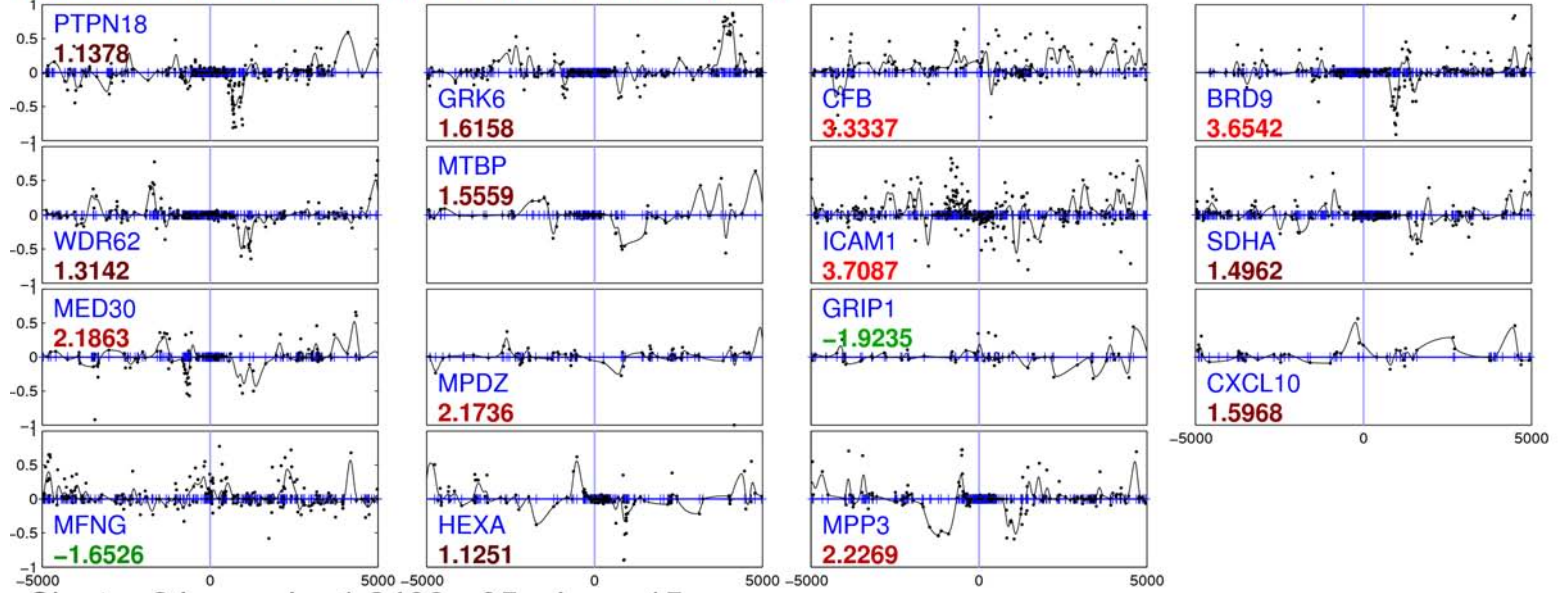

Cluster 24, pval = 1.2499e-05, size = 15

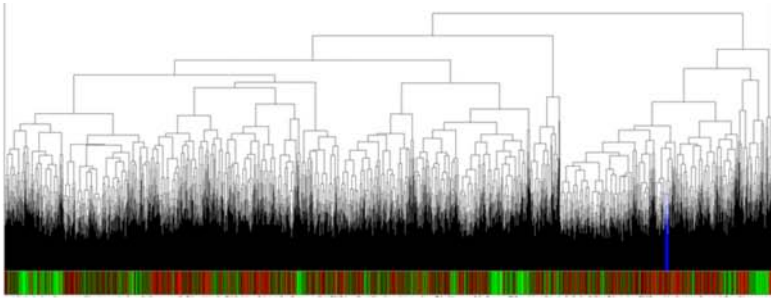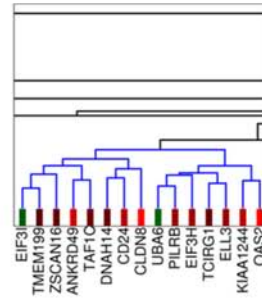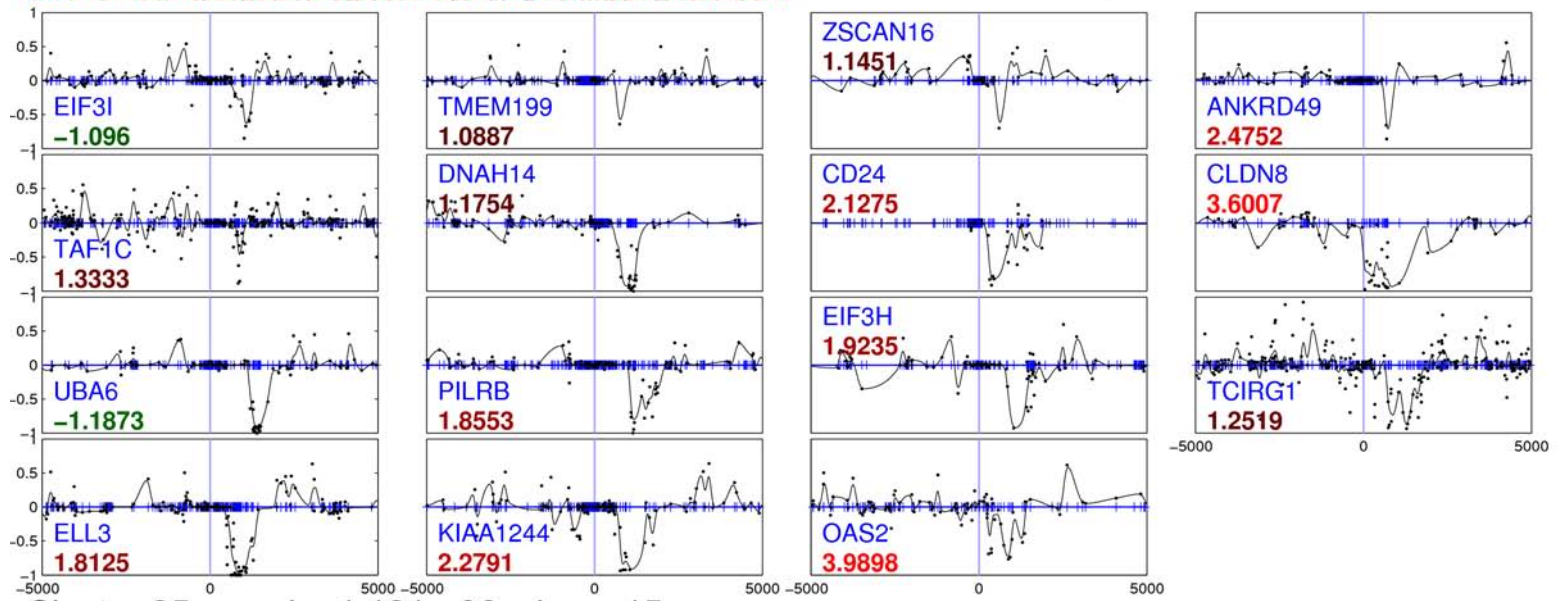

Cluster 25, pval = 1.181e-06, size = 15



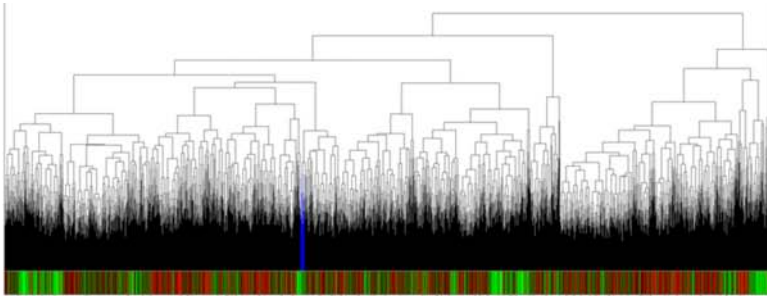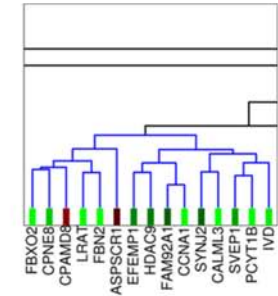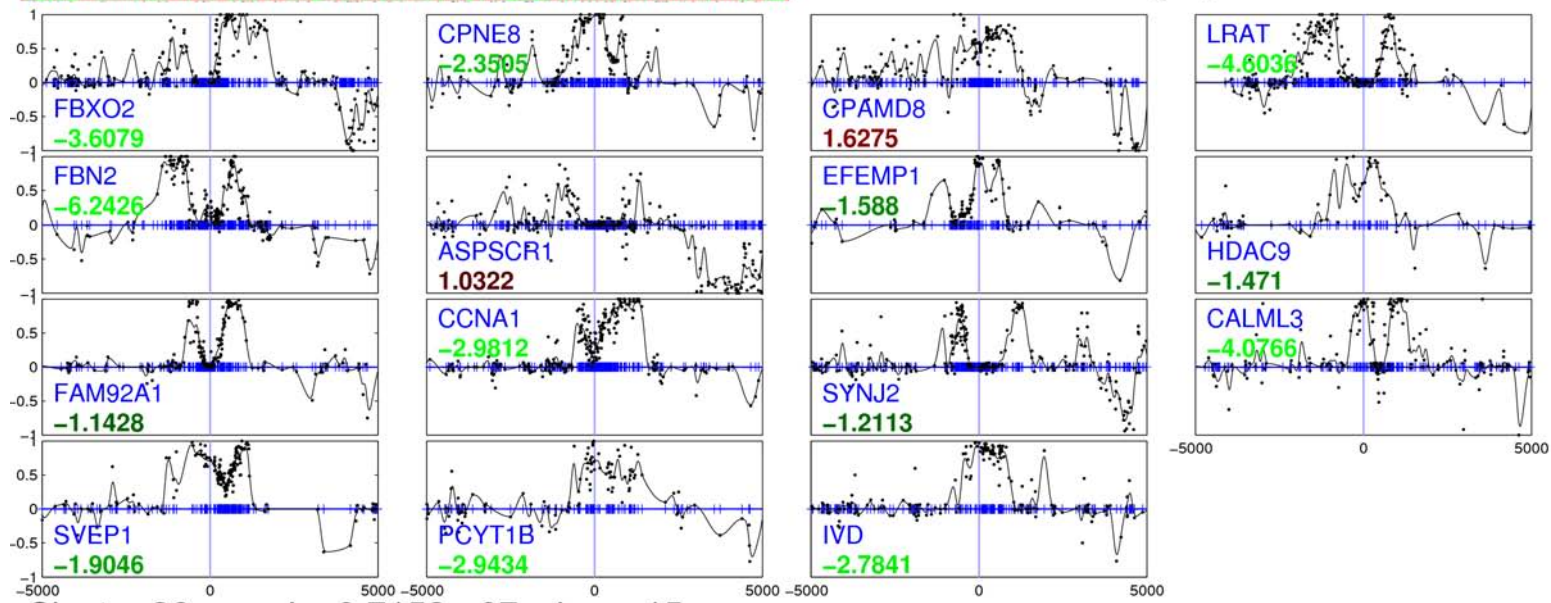

Cluster 26, pval = 3.7152e-07, size = 15

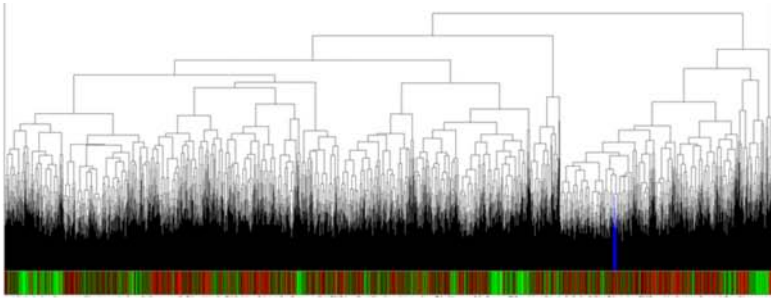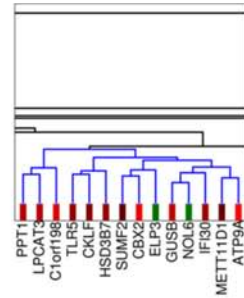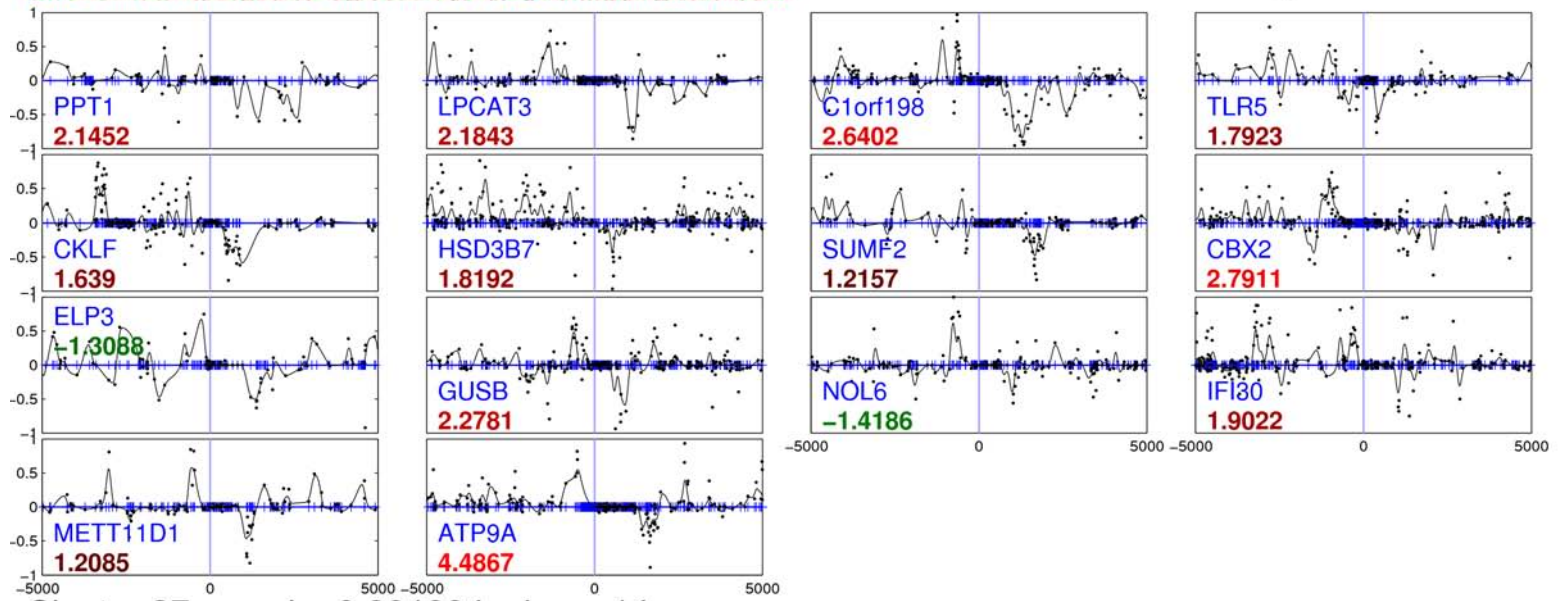

Cluster 27, pval = 0.001034, size = 14
