# Supplementary material for: Discovering high-resolution patterns of differential DNA methylation that correlate with gene expression changes
Source: PubMed Central journal article supplement — Nucleic Acids Res. 2013 Jun 7;41(14):6816–27. doi: 10.1093/nar/gkt482 (PMC3737560; doi:10.1093/nar/gkt482), 2013-06-07
Supplement: supp_gkt482_nar-00858-z-2013-File013.pdf [file supp_gkt482_nar-00858-z-2013-File013.pdf]

### **Additional Data File 3**

#### **Complete clustering results for H1-IMR90 WGBS data**

The following pages contain all significant clusters identified in this dataset. The upper left panel on each page shows the full dendrogram. Methylation signatures are shown for each gene in the cluster marked in blue on the dendrogram. Expression values are plotted on a heat scale below the dendrogram (red is upregulated, green is downregulated). The upper right panel on each page is the section of the dendrogram with the identified cluster. The lower panel shows the individual methylation signatures for each gene in the cluster. For each signature, the y-axis represents the methylation difference score, ranging from -1 to 1. The x-axis denotes distance from the TSS, which is indicated by the vertical blue line at the center of each box. Blue tick marks indicate all CpG locations. Black dots represent all experimentally measured methylation difference scores. The black curve is the final signature used for clustering. Values in green and red denote the  $\log_2$  fold expression change: red for upregulated and green for downregulated.

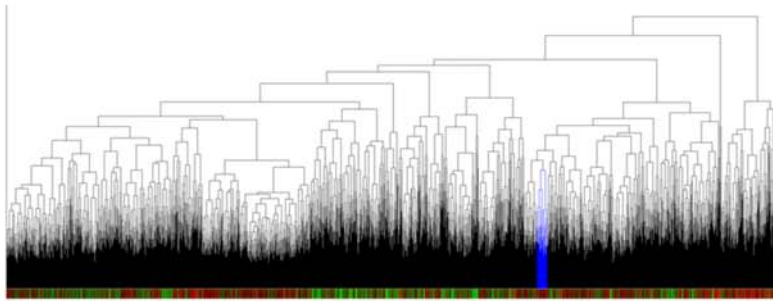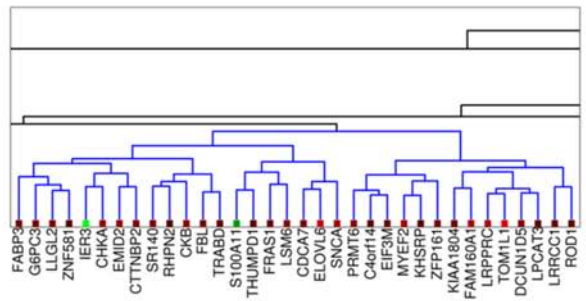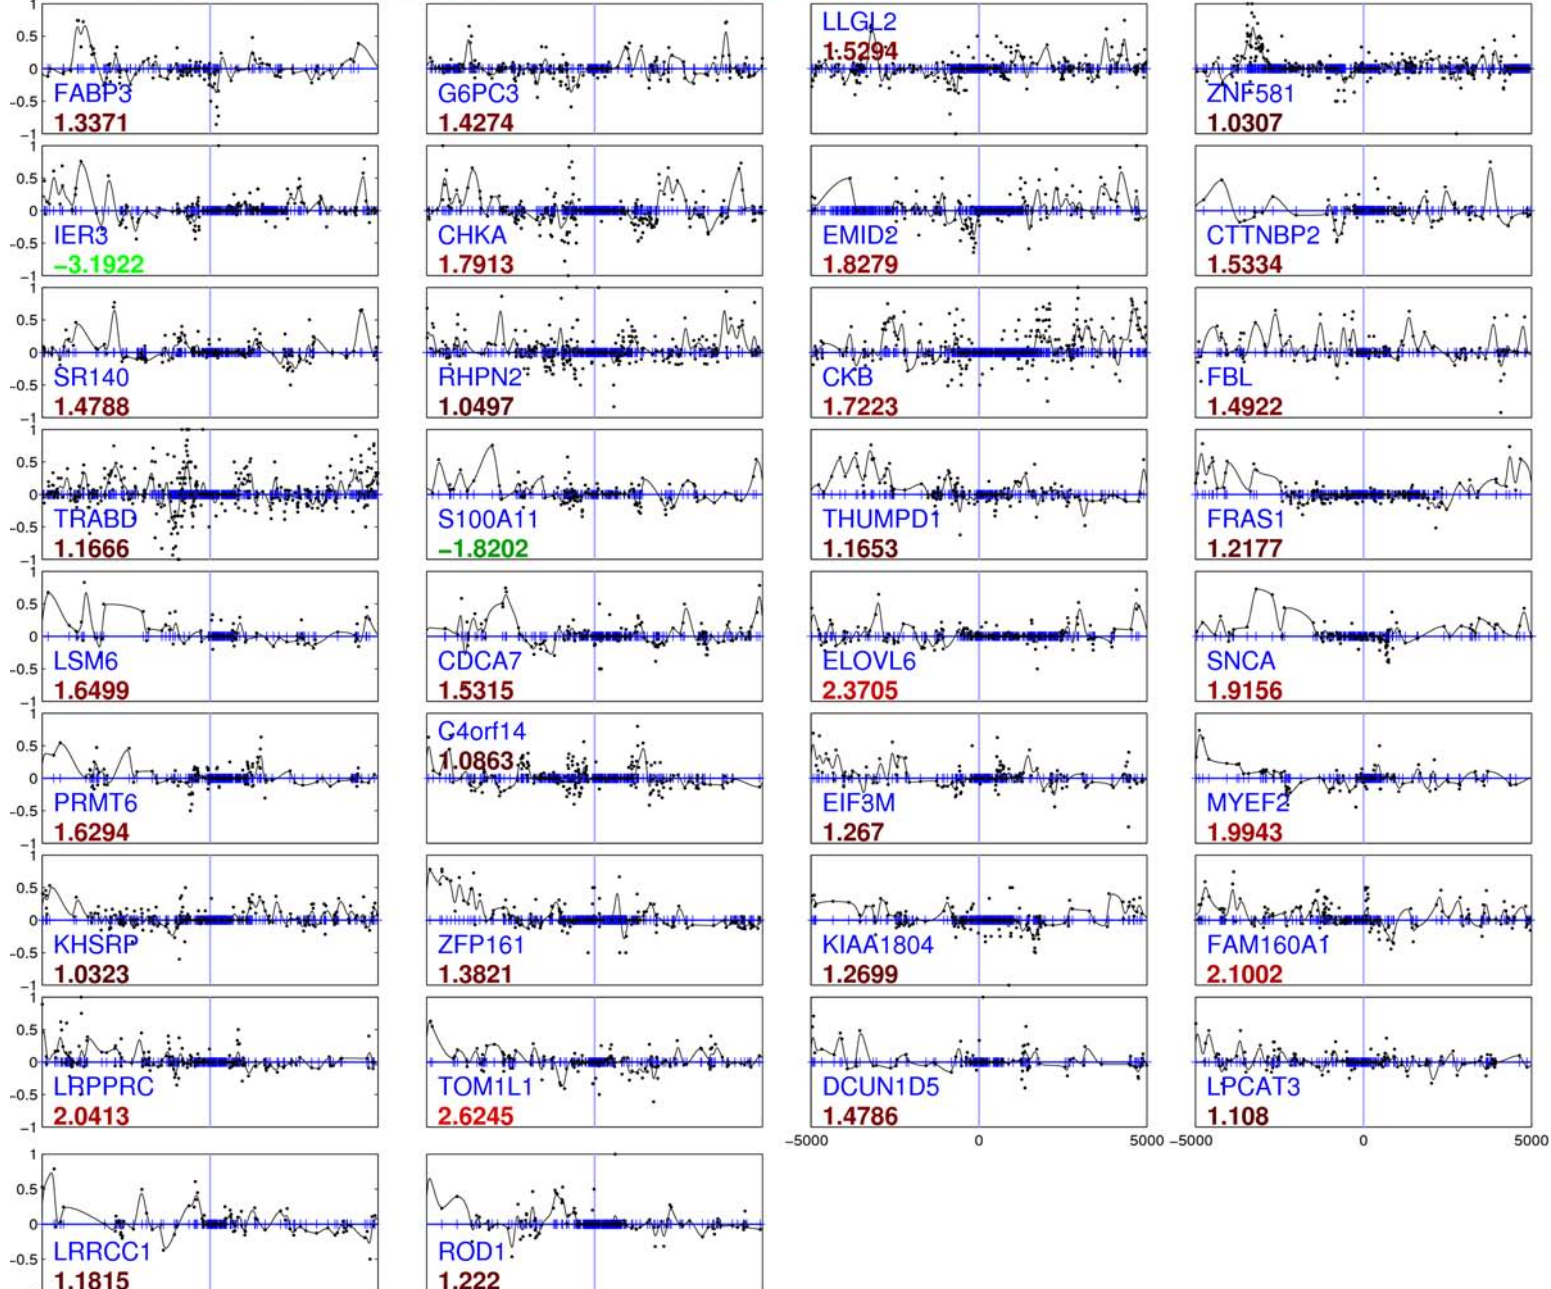

Cluster 1, pval = 7.4715e-05, size = 34

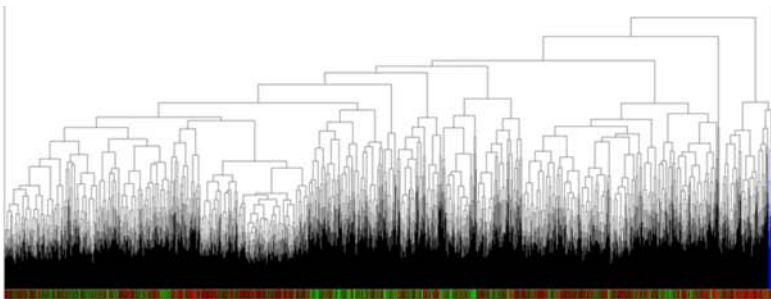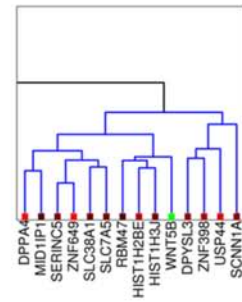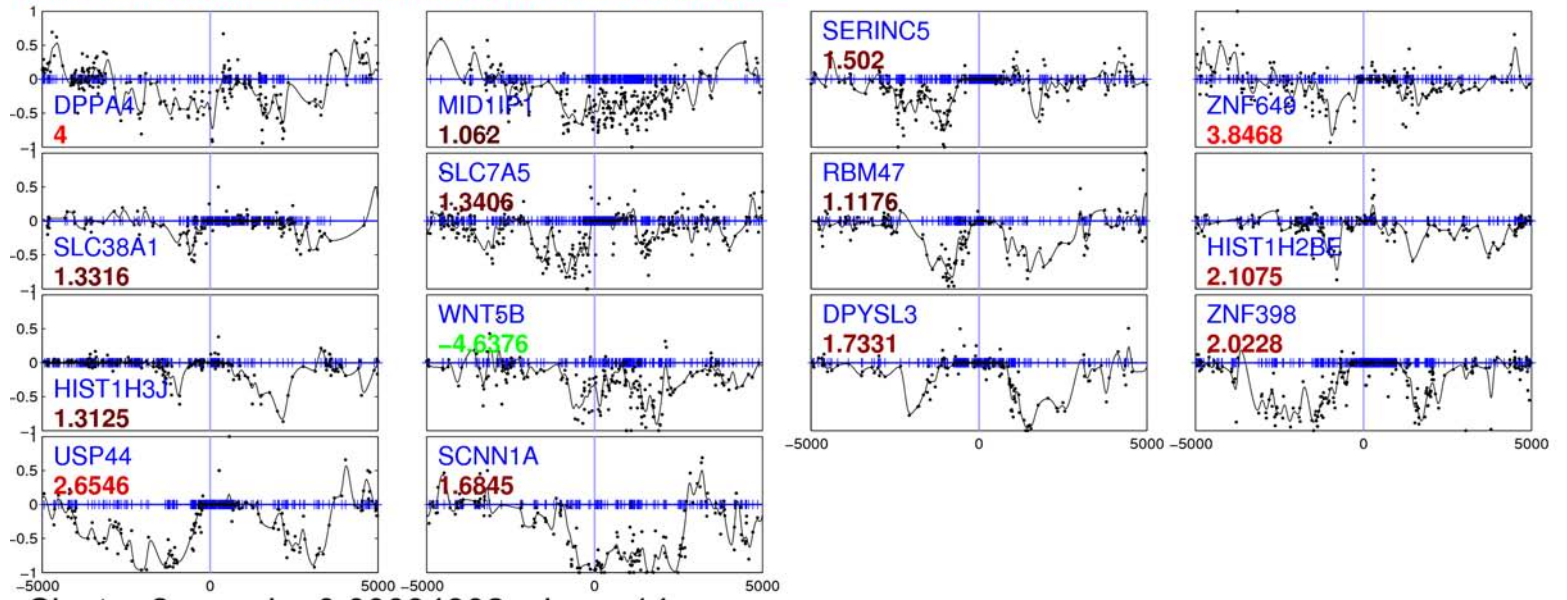

Cluster 2, pval = 0.00034302, size = 14

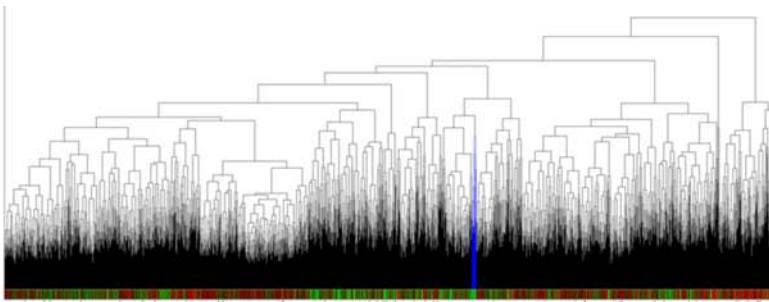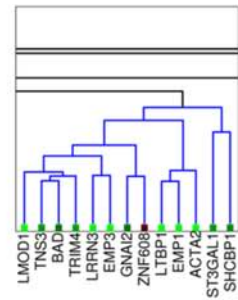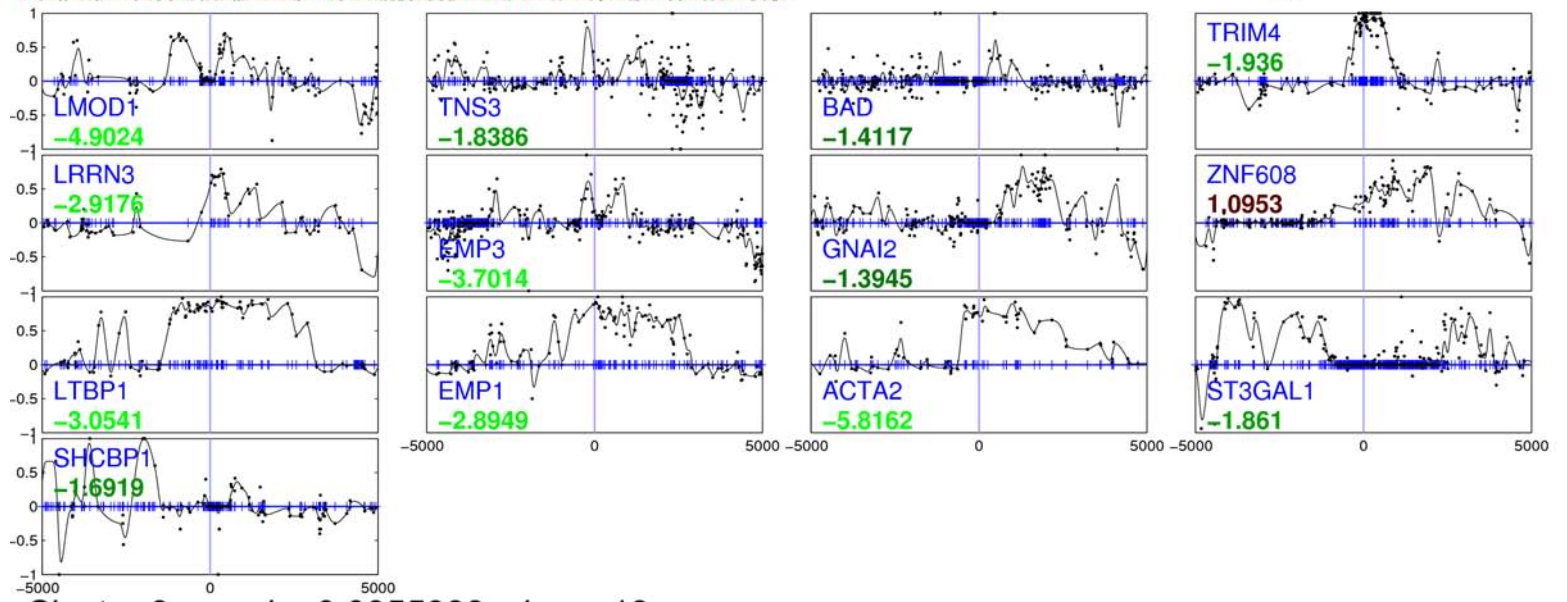

Cluster 3, pval = 0.0055933, size = 13



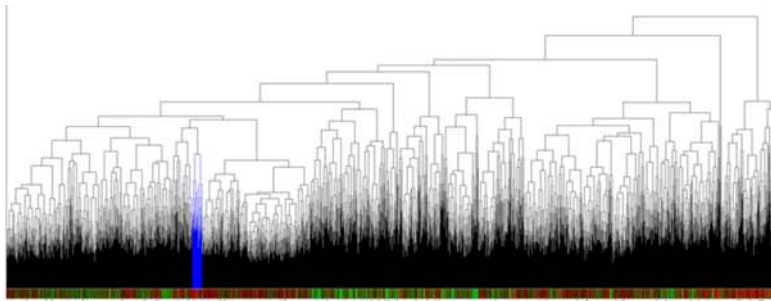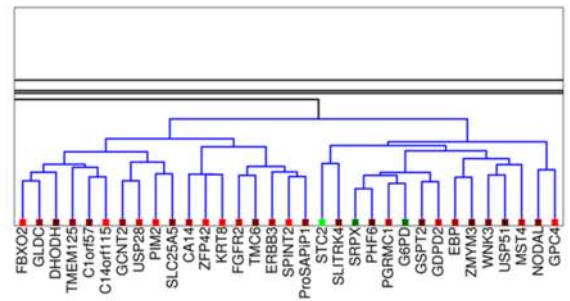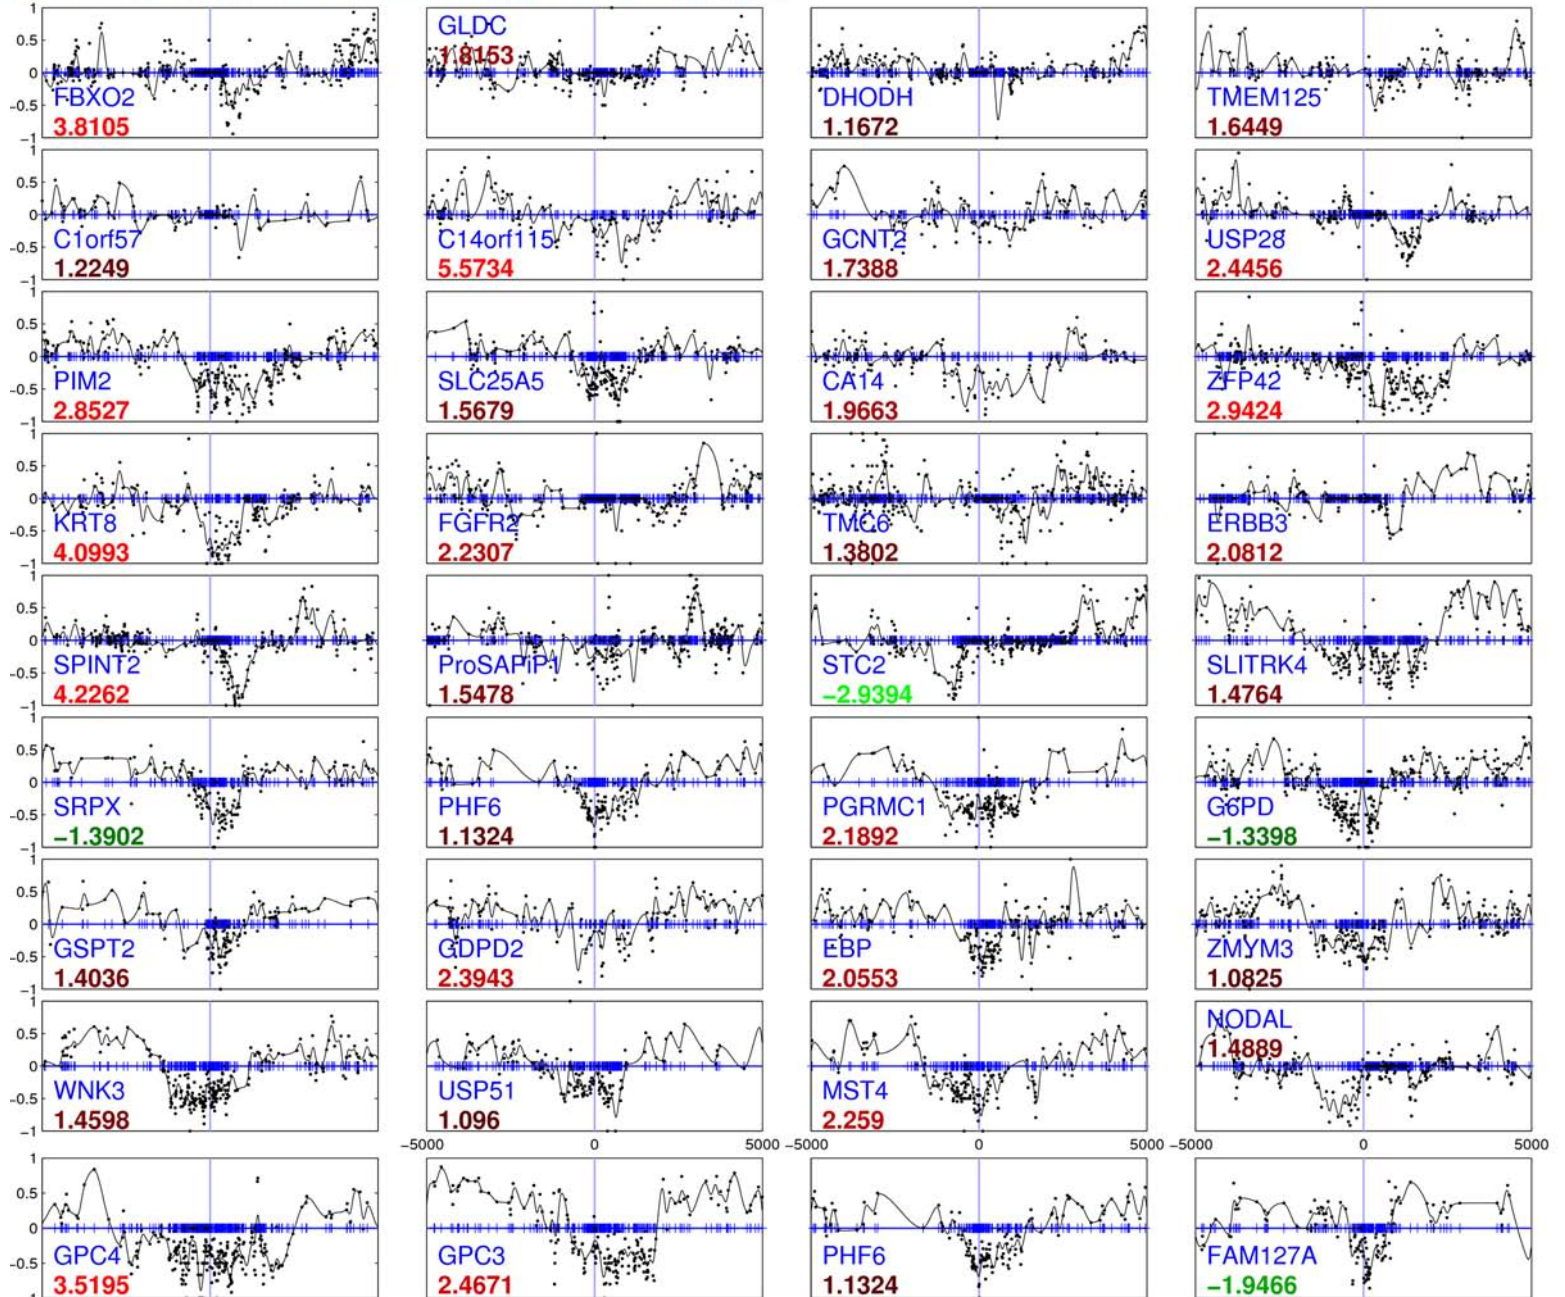

Cluster 4, pval = 0.00016892, size = 33



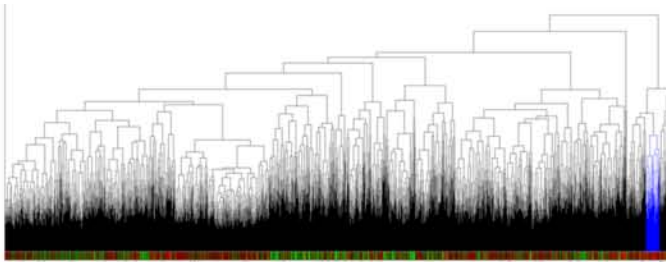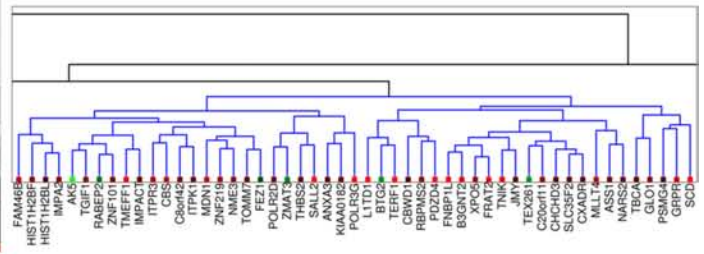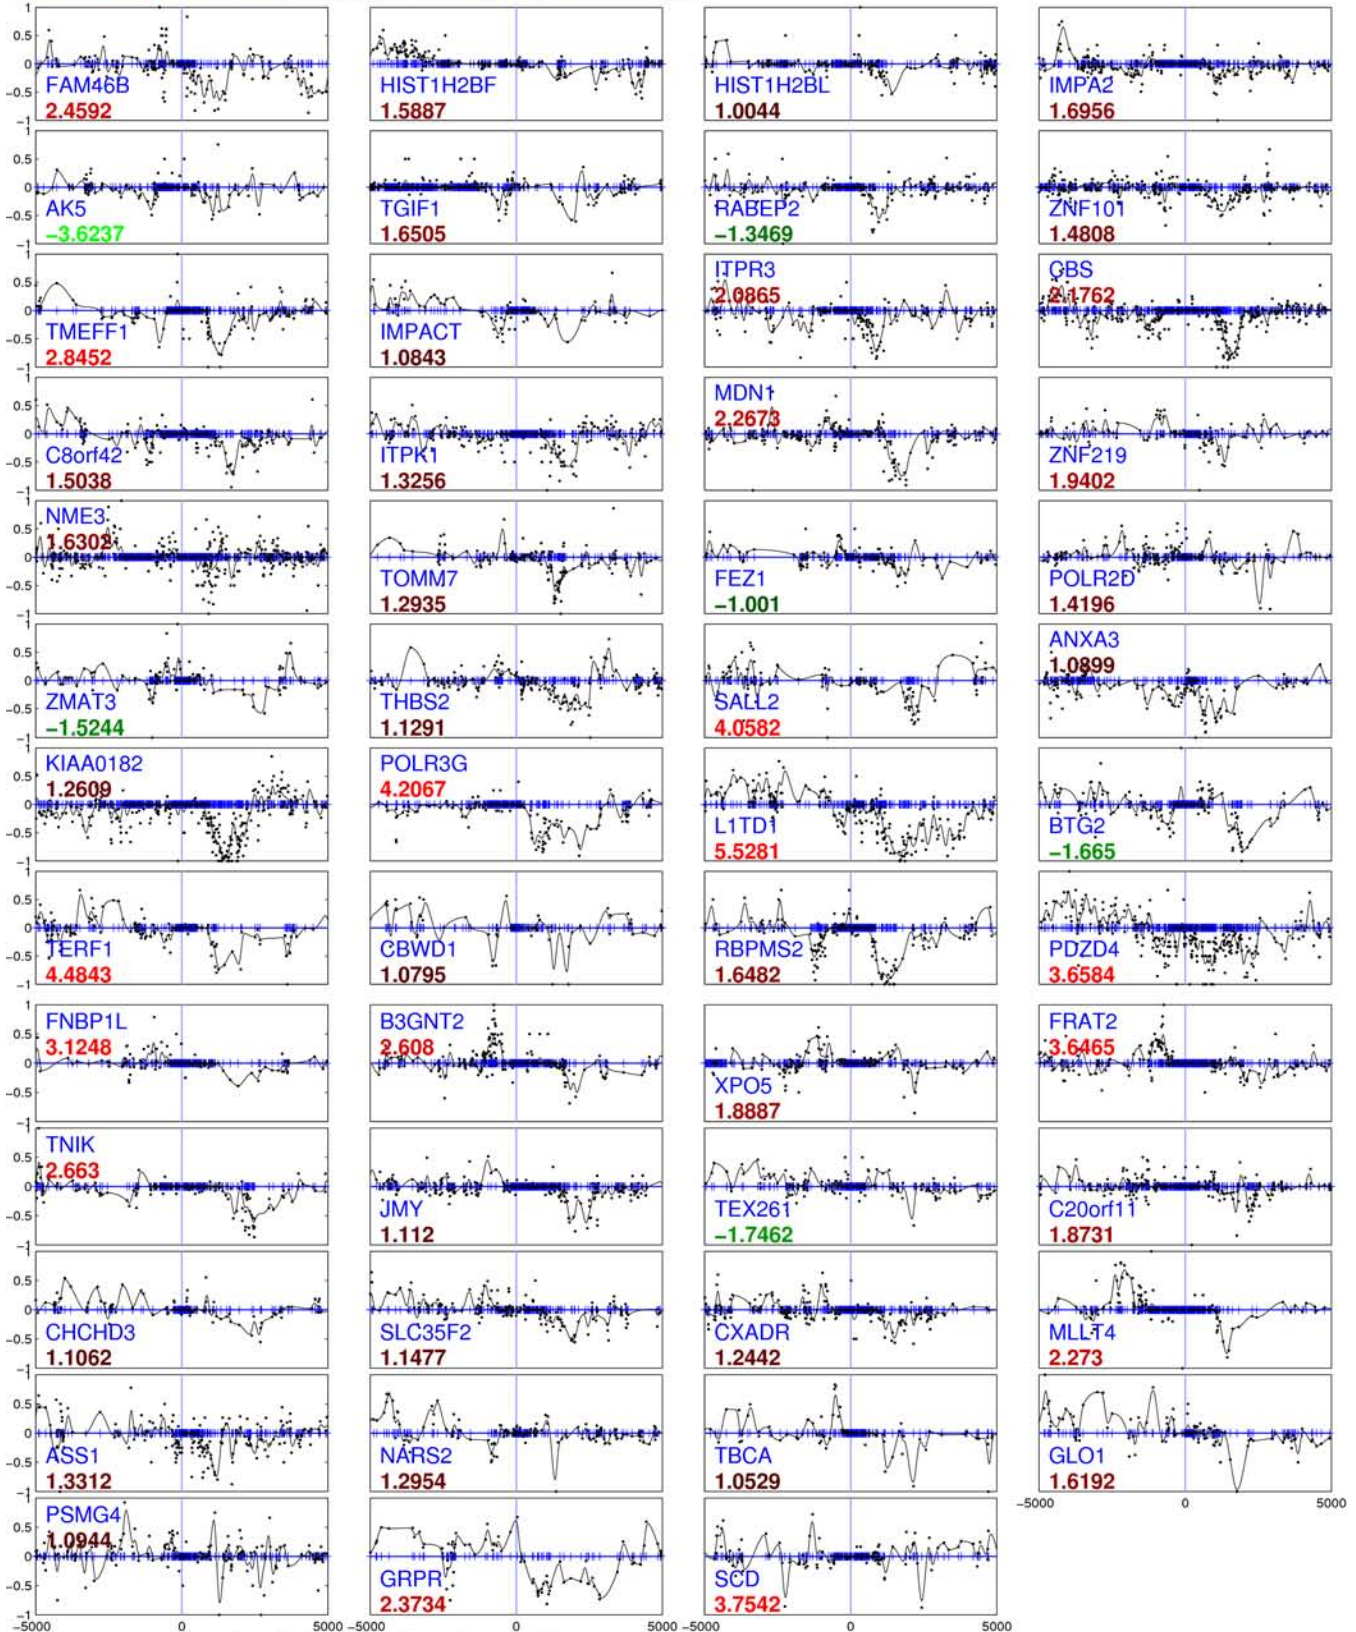

Cluster 5, pval = 0.0014176, size = 51

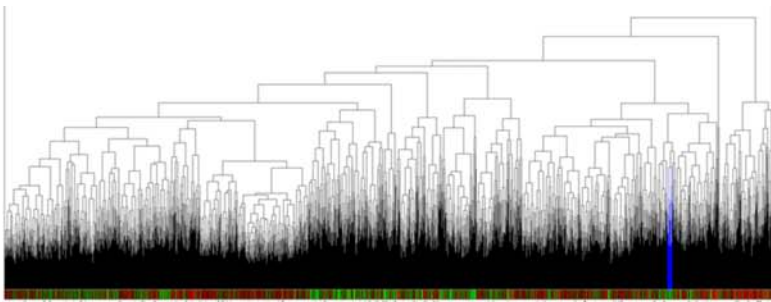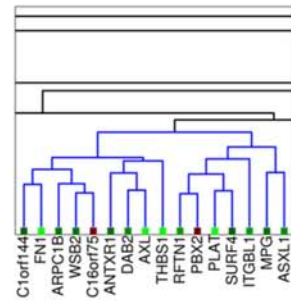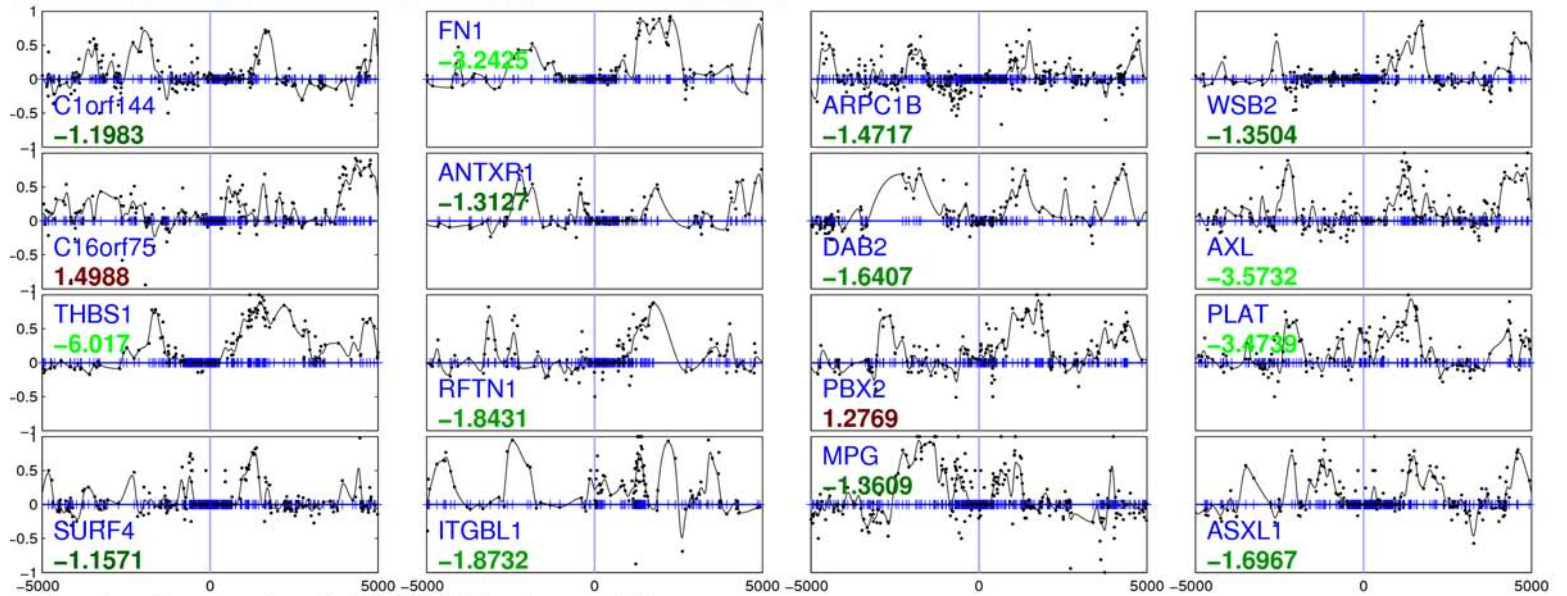

Cluster 6, pval = 0.0092535, size = 16

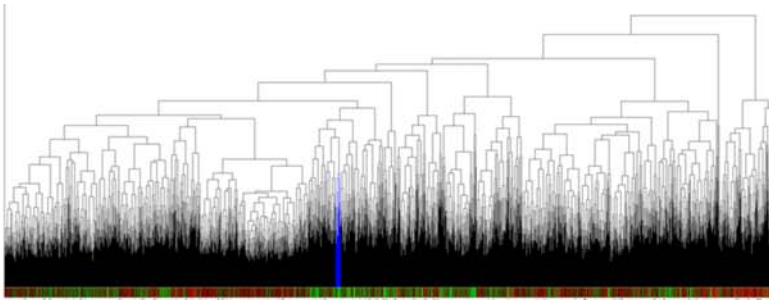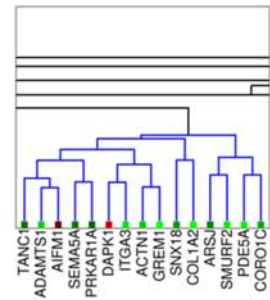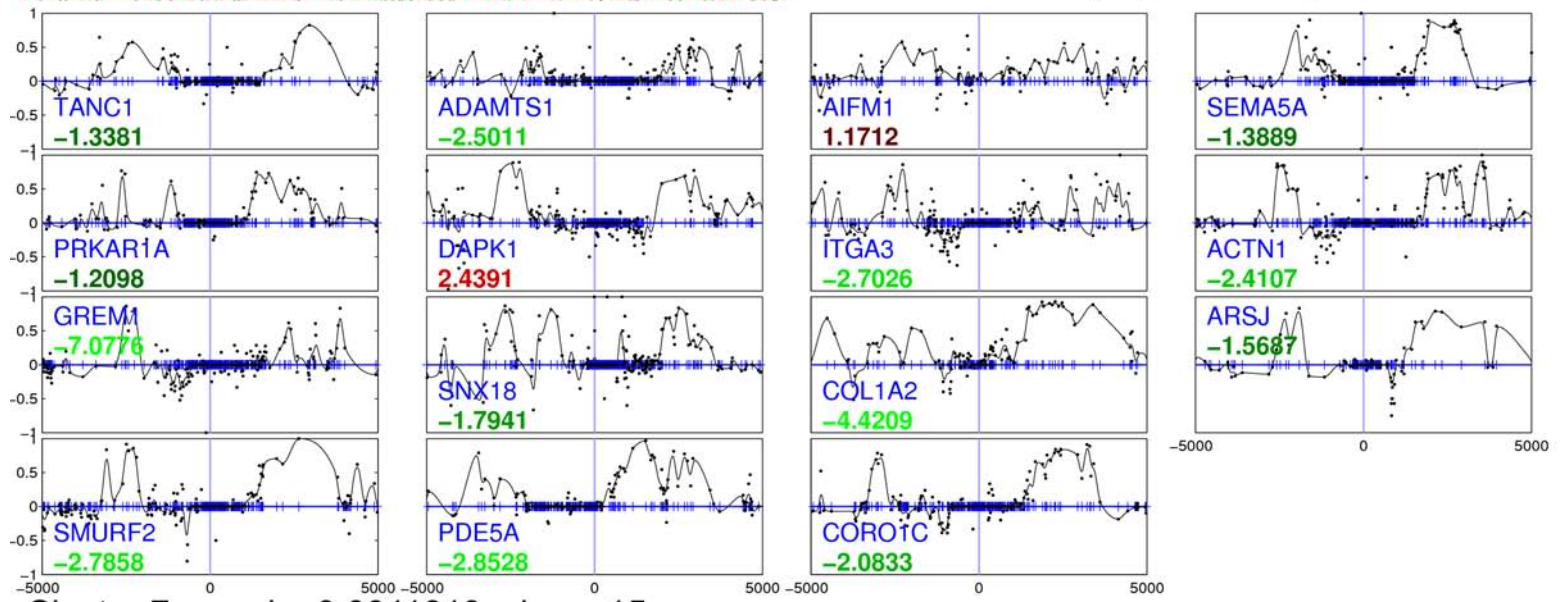

Cluster 7, pval = 0.0011819, size = 15



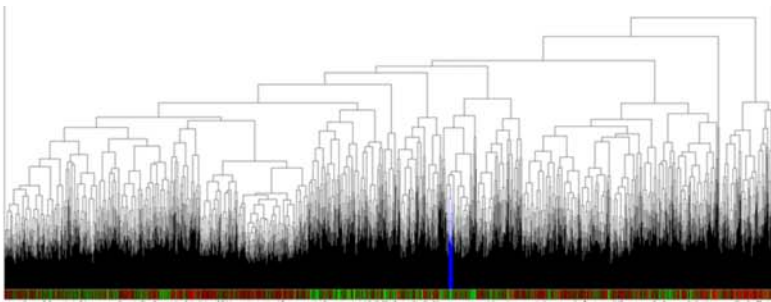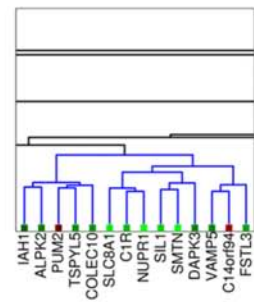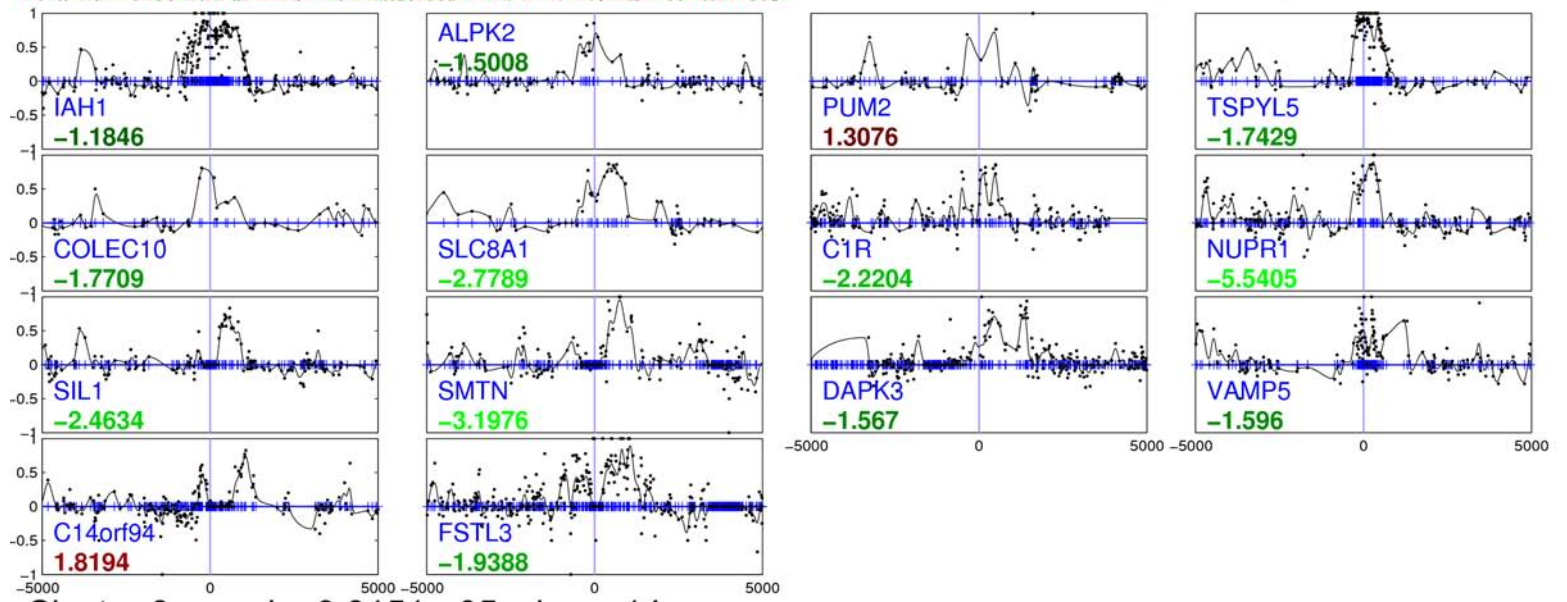

Cluster 8, pval = 9.3151e-05, size = 14

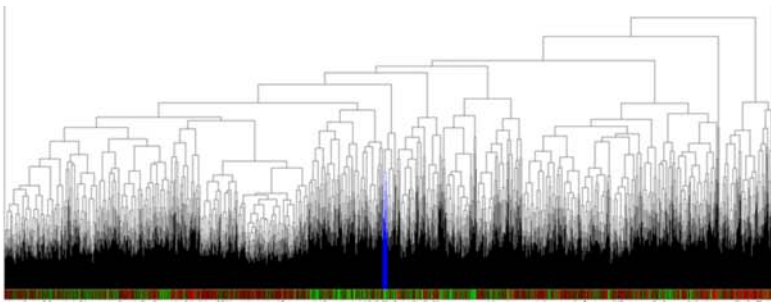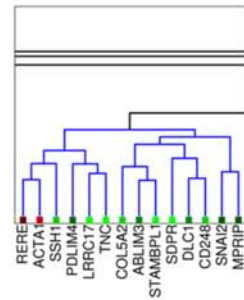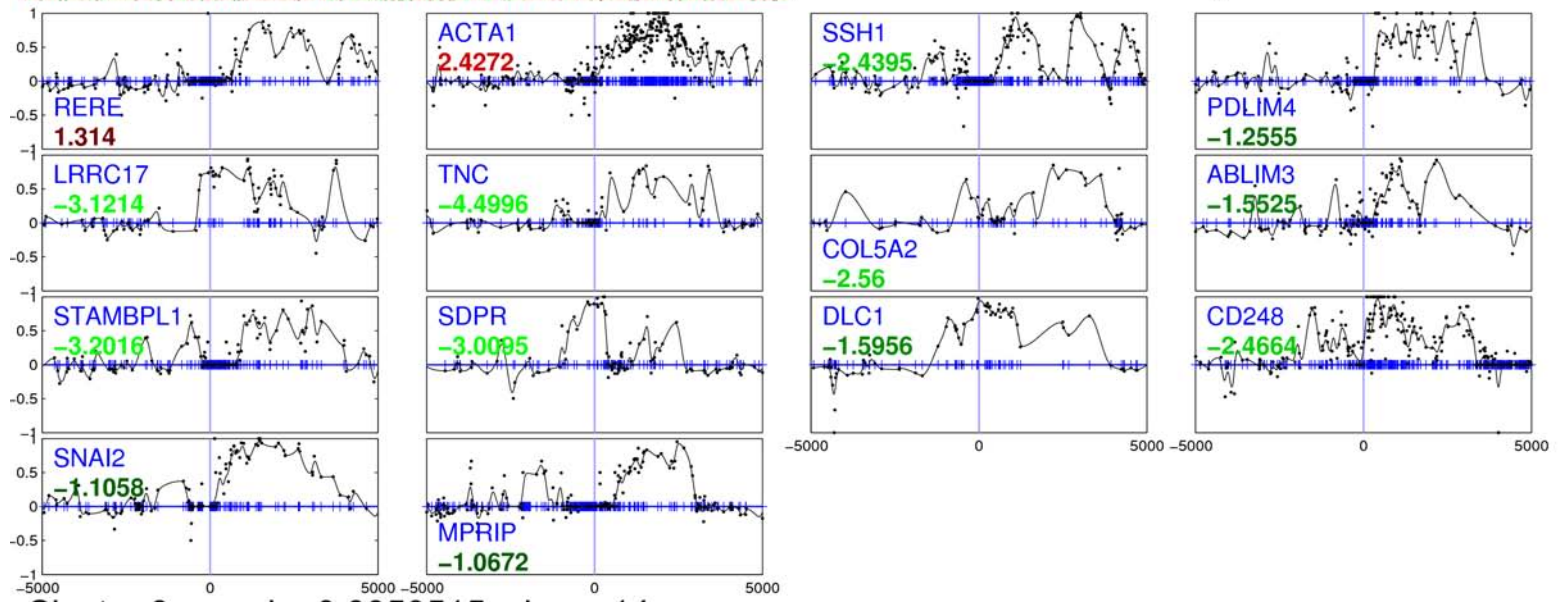

Cluster 9, pval = 0.0050515, size = 14

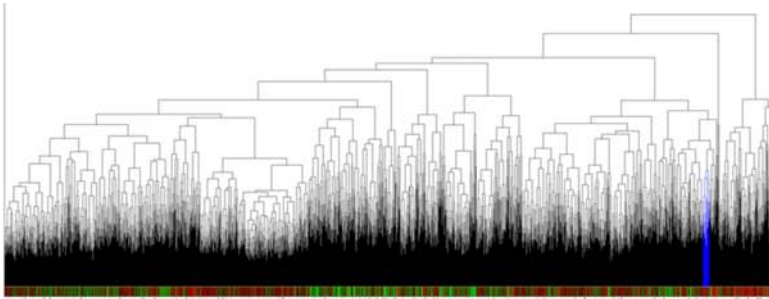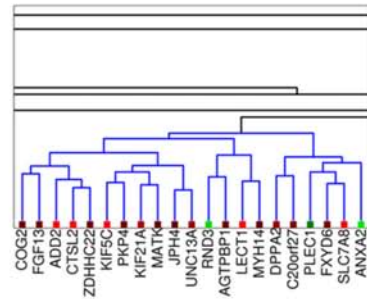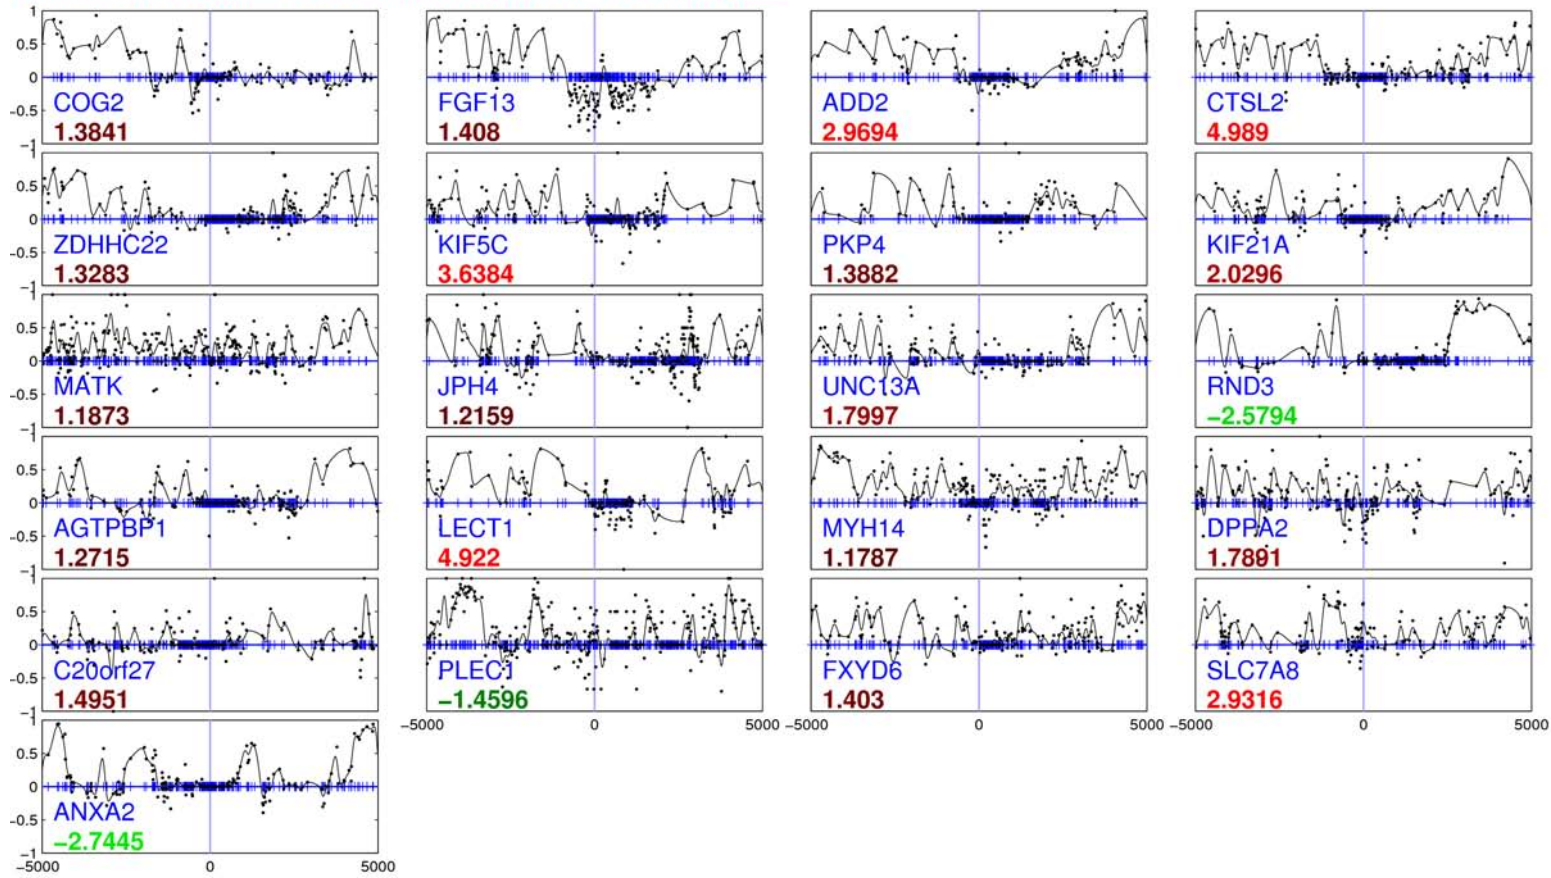

Cluster 10, pval = 7.4951e-05, size = 21
